# Supplementary material for: Kingdom Chromista and its eight phyla: a new synthesis emphasising periplastid protein targeting, cytoskeletal and periplastid evolution, and ancient divergences
Source: Protoplasma. 2017 Sep 5;255(1):297–357. doi: 10.1007/s00709-017-1147-3 (PMC5756292; doi:10.1007/s00709-017-1147-3)
Supplement: Supplementary file 6 — (EZDRAW 112 kb) [file 709_2017_1147_MOESM6_ESM.ezdraw]

<?xml version="1.0" encoding="UTF-8"?>
<!DOCTYPE plist PUBLIC "-//Apple//DTD PLIST 1.0//EN" "http://www.apple.com/DTDs/PropertyList-1.0.dtd">
<plist version="1.0">
<dict>
	<key>AAAA_CurrentOSXVersion</key>
	<string>Yosemite: 1154.000000</string>
	<key>AAAA_DKDDocumentVersion</key>
	<string>6.7.0 : No</string>
	<key>AAAA_EazyDrawVersion</key>
	<string>8.3.0</string>
	<key>AAAB_Build</key>
	<string>8231</string>
	<key>AAAB_Distribution</key>
	<string>Free Market</string>
	<key>AAA_DKDQuicklookData</key>
	<data>
	JVBERi0xLjMKJcTl8uXrp/Og0MTGCjQgMCBvYmoKPDwgL0xlbmd0aCA1IDAgUiAvRmls
	dGVyIC9GbGF0ZURlY29kZSA+PgpzdHJlYW0KeAGVnUuTJMlRx+/5KfLYc5jafD+OsCbD
	kIExYpoT4gC9Gs3CDmJ3BDJ9e37/iHD3yMqq2hqT2U73v+Pp7uHhr0j93P6u/bntLkv7
	Y/vd91/79u1r2/P7vnTrNo38tG3DOA97+/Wt/e7vaPDHr23Xbt3SfmnnJf/0k35quvYn
	/qL/fvYWnxhgXJdpPf2bhxs0XD9Pl7nblnad+suyzXvzBWy9rN0+Otb2C6vq9r1Gpkvf
	sxLr177Rart02xpY06/DpVsmkFFDbntbIeNlHftd/aJVwU5IPdKNfsN+WeeJ0X0Fw3xZ
	11WIrbMgjdZpu/FWvuNAjC6G0G/uLvPYsxsbq5+Wyzxrf74CR8ZY5wmLfqVVc0JEl+hn
	1PMVFG7d4N8bInDiKgLzqR3a32Y5+/5jEpau/fg9AojI8b/3+mfr5gtMepMM5P030G/o
	pn5kBJcLx5ySFVLo7YjoneUixnL+8pd+6/uhkoHh0s8bCP1cLgwzpOEvuZUhcOBGv+XS
	j7NGN7nYOqR26HuXi8YRrbPIhWO+4wopcuEI/QpXYqzgnK/AeVmt84RZv2p/pzbMZ1hQ
	z+TCqX7m30EuvN2X9iNaqOP4DPt0+hdF0Q+XfR/QRsu0XcYt6Yd1vCzDsBiE1ukdGjgR
	3TwI856BIZqO+nhSVMveDVf/PBBOG0P8mbteslkW0BhUralfd1Y+bfWaKqxak3VOVGnS
	wbhwtKdeGnjb0YHTOrQLs07dpiNxxu4jjfd7a3d20K2s3LF9loaFzBy8Cb0av/f8Pq6c
	B4em4bL009g4gBbZBjboAAqqG+ex7jSgisexmrnfAbrN99AshtR7NSz2dR+h38IukJYY
	axtBOvQHEpMWUAG+yMBsJ4HYZgOZnSIVlqlm8wddY93Gtbfms+852klBSg8+Uoo+Vo/s
	Tlu/clmesKeQSgJ8LGNer/1tkzNTR3nalpqZ/TJehnVeo01SlRy7MkjTo5+2mbs/xKaH
	Wpv6mOz1UIsbf6xWbEhIACPdbRV7tzYhAW30KxLASHkBzrVqkYHZTgKxzQZSKMJdXmGZ
	aqwkSSBaMvOo2p0hUoWx9uBlVoXdts1bqEId/X3l2thhwcIVwe20SuN0CwZTOrFMOQ6j
	1Eu/XIYZJentAkPUYNqGNVdjE8d+Q7+A+XjTflnGcQazebk5vZ1h9XifvWW9wk+3LveG
	y92H6BkWFZAud5tedNvnda2X6e2qpfczWqhb++aASUfOaYs+3iyaLPV2uDG9Xawlxqu2
	4zPbRcXo3Qx3UPv7wmnN3MEKHVb2jmgPGKBwp0/KZYETBcsUHjdO1jJvGHIcBZnLLODU
	+xHlcuMetbQvw1RNhcQVrJqqn9bLOE/TYSqsPe+dZe6unY6xgmrnanY7m70l7c7lYVjT
	D9tlkC43pO1HjsPYV/24ysdZ91aF9aNuxhmk2OdNhYT9Gq3MPv91RHa2t3Lr2FdgVnWs
	0xCZHLabgrE/cVM7tlZBF0Po16/oM3gSrXo0zjrPbp83vSOVfX7Czq1OiPYX/cw+9xW4
	fX7iX7LDrlEukpsyl0xxa1wZbU4Qx4xolZFtIuBtxJIiAo45k8KYLGwLI1T9TFDMfH0G
	iX7N6oawrcANaBcBR+hnIuCY7bgyso0u3oZ+xgDHgkm+gsK2w/6clb6/JxDNlwWsCerZ
	CoLCtk5HDiLgaNZwPWbSNnR7g0OL54XPnQ/83OPfOpboI386kFHOy4AKsH6iPlfvto0x
	Vs8579ZR/fpLP6CXAkHvd6hHOV7eyjBDmvUaQeXc6jdxh2Bt2gqSYtqWdQPJ62QkNJsQ
	5hO3024ME7fzjgPJdImRRH38frRrjKULeJlSoMJWEEis84RZv2p/pzaaz0Z36pUVBNXP
	/MvcttUbdx4e+NKYWZYN21kxGSOIYUG0QEwEHBErswi0hqHhiwiwknXRxRyI9CdHqBYB
	rOaMnVpVI1kbzVdGly89LosYXlaAoHfDgDNuyzTgLd9fEgCDfLsBFJoYENyPToU9Tcxt
	DPNdVEx0zNl6QhpH6n5ON2O+0RaeXHEOSsq9zGjj7cyYKUaMGTPlX3ndnE5J8TARj0n2
	zJrsgMEgWV0OdeOl64sBmvsFwvTXY8nfPszc2O8PXO48CGp138eslGx6x2JJTd+xZQJw
	yYhMS6oQX5L3NHrcNIMa6KHLet6WMHnQiiNm94y5F0bPRHRnJlpRIeNlXDrMeTOMuLZl
	kY1yngzT2cBUEoL0pjBlhbgZdMLET+tXWp2Rt2p0M4NiBcV4aSZfZ5gzsRvDYseOOF1s
	pLdWs2z9IlEpQVD+3bopISVQGogom8OwJ6w5Ie0ZYT4f3agXKyhmUHPmnw7GGX3CC4+x
	UAUWmnTKOObUC8RobEgtC4YFt/xGD56abXDgaQ47VrJgrR73M2vEZcEslpAFQ1AivhvH
	fMeBmCwYwv6cE4ZV3LIVBP9s5TVPC1bJgrV62M+p5yswCt/g30EWrB0nXL7RyD2+zDLh
	dXMS4+Lgr5dl3uchmzVAUIdgl9lHAlCI06q4fOkEBbXdYeeMFwgve+i31AndtgxzE4hM
	mnVRbuKMPYFIsHz0iQ3sOGKxAA5FcpJjlYYkRpetFKyx3SZ1lfoFSaIftv62dV3O2aRW
	2FTrPhESWssKmgrx/Z2xJxAJlo+OmIt6baygEDiW6UzgyF+x85Hj422ZYpkG3P7gfbJn
	EmbMT7drRoz73q9iv2POIVa3EkxbnGfp1sdKkWkarbBxEvYMEv1ki2w7+TVnP9EsRXz6
	EFJHKvY75uw3pHGyGMIynfiOOYNsAQ7Ipsm7C4lw7NzqjFTcN9o1vgCnry/TkXTMjf+O
	lmMuc4GQePuX5k5GCr8RV14uT3eZ1mVV1B+vlCPM4eo7PAilEFgttiMxAHmCXPz4BsTu
	RsL/yXrHmJ4hV1IsRK/4bWv/citMlh1v5TKUz2TGee23ZIeTBZmWRYFHAgs91jNTzuNG
	6JWw3TRvKwiR9RXnBytsS0H4HOQxm6vftn0lZSs7r5NZx828EJUdlKrC1O8mpVcIUxnW
	dyQciKdWSN+hvdB01oYjSToWHYAN7d2w/OZl1OD8gDHWB1CcRfXyRnQfho0QSYWsEwbW
	ASGglhwEb0UkdV6JjWp+GMMCNiKvpF47YgZ7Rwgu/67dwotFiSNrgTRAzfh9wPyCuFUP
	1iLLJSPYlah6hWeJvHIJdOK8ITvrRw5g7xk7IdVIN/sx7UiWEPYoyR0kPfFL2YRbXPxE
	XvW+ZNkwih8scrqD7SlElTBnu7cSiRPbHQm2O+Tc6vsJ+3QMhgrYNzJYFdtToHSRtBpD
	hRC2vEKGYR2TkBXhkNPE4BKOwnadOPEjcx1cv1ZMt79nnrOq3LywPJoXjtvfC3s13zDi
	Czkr08rXfdCqTAgMewo59INUFD8Yw4OYJ04lj+6EZi2WM4Yq2ZjktXQUdtzRZn/7Srg4
	pZveS30RhqfWQ2lw5GHClXv90n73+ooEtq+fmpcPH/7xXfv6n+1vXlOyVgUjHdrtFAlf
	OXjUjkgHkFKdJ6kTMkJrN+DUG4bruEk3zlgLC+kS1I/StZ/bW73vRiWtMXycYQxHsprK
	sWoqBWtQHcrCVlN5SwjYkIiuXFPUKK6clCT54xXlmRwalKTsgMDQKaQrcsJ5gIkb7eT2
	d2QhNVW0xGAtve/uyhtjL3MGsZ5iqoZMAXkexsfRxaVPU6GGhm1ecirhVu8H8X2JSD/D
	Hv7jZinzkZ2Yuj2gfpEW4uIy01Xpv3VfAyCCspClI5ETTciwUM8DUOyzfjEkrNszZkgO
	hEmbG4Id6VZjhXGaZd36/GaSxhrNkGWzvhFv5XsNxAhiiIhEqilMW9InXDnTxObMuK6Q
	WGS0KtipVT3SjX5OujJ/sWNPPEMlUHdg6y6tHgX4rG1lBDnXDYOlhe2GQL/Cd0dE08x4
	h5w3ZpvRJHO+tmsNa93yewbRdGUsMyttfjc8fZGOVIx3zLdrSBDQEN0dmfCOOAN9duOx
	b4NOBYvtGlJt9kG/NgiXpzfSxhINYYkomBvc1KnnMrD6u6TFyINui44oYY+JMKusScSf
	mhp8tIKBQF9uoQpBDMjkBSByjhimKW1XhuoX4uXrTpwLQ5woGtekI1ijI4FXkfOEnRCk
	zka62W+9YAgQ1PUVoFR7fG+QskwD0Em+F8Niv4EYVQwR1/HI9pHNFIyRsBJ6ZUEHW0Ag
	sb0TVvXLreqRbvRz4vkKgi+2TuNeZv0VynVx/25xARhg6IaCDwFQLipjFdEMccoWoBYA
	7+Zsoz4Nf2etGIkXs+U8izcqUDD7HhBC03DjY/vLSDHmc0muxPiD+Q6IiUWQHXPmGwIz
	CvkMSUe+MN+xYKIvwBltW6v4aju5bhPDWCfWaGJViOaiV/PDWGykPjLe0GwAUsbLQVOV
	rpl/uYrsurzyaP4RLMOGwHPcl8s0kW45mH/ty2/+WdZfU1l/Vi6MlTKsXITX/8qygDl4
	SjP1wUTsqDOTuBGzn/qlcSiH7IFQergWeLEg3tEhuTjn0axuj/RBXb73IIlgg1AhRsyF
	okJfUmtQSWxoSQPiuuDQVUsKqFqSdWW0pHe5NrHJ+oYSDyKGeKJ5FoIHa+tY3nnGcMLG
	Bd8brPQlvOQYM90Y8f4xtyEGwgYEBHJ1Yq/8xdoaVnaZMfz1ecBor6YfAovpvXfZKNkO
	4kgbkYRUn/jY23iPw9ARIHlFMsLxQMFO00JwZOBGHfE+mtrxaF/+qfI7DrJ9362JibCu
	3MNBb1NpxjwblRxkkK4k/O+reW4MraKlqyODIO+IcYtRSlSXCqrDwv+1fXn765/fcS6G
	9uVP71oWxQ9f//SuyT/99K79t/b1t9mhujGhwj/HCUkM4drK3+VenCeSztcT6pTm0dsy
	MbNk4H/thy9/sJ/+u1pBY8e58h+lQJ5aGCnCsVeScCBUOEHf48Jefv/y4ePv353dxyQ7
	8Ke/XwUOAyEzzh2nsyd5uydZDowcn4wX1TjtOz4Qh41aKkriUvXxQprQEPnoMmdlyBgG
	IqJi2A+UQ+WRAinzqZ+1UrRvwUf3gdgwUVpcFK7rOU1niITcFmVYbCYPRJO8u8Z3p26+
	Y7ywhUs6EOy89AgiEC7CUW509GukoQZCeNUC2AC1vozkyzREuzOqGGb7rUZyClTzOear
	coQjkVdekHp/yR1Np/KBmnYacF3MaEwpUKcVEQpSqpwDuYOKuK5YgMrza3d6m2JA2Rwp
	WofS3kZsEYJJaRSYCXczUuZSN8NwNsjiyOKASmkg/iTtEZMVAGvT1mNNfBc+iiO2r+Ab
	KyKjsZHHiJ0SG+mITzhCNo0KzglO1v2Ir5BrqujBJU5JXb3GgtghSBvxVr5ZHyiQmM6x
	sqiacLZwbxPby9EHttRT0frwmigqds8am9VzJgmyw06MtFFB0Gt99/qOi7Gv1OvbmpVb
	8zJXyi0NmOyh++oMLdmNyBCXU7UAmXs8EBrY8rgOV1cTGv71R+ZDI7+8XU3n1Q0eQrox
	9flOUSR/x75FnRJuuArCtUz41W6UX/xK+fLvzN08cZPk2vL3fddSCkcoRS4abyGGEQGr
	KdtoY+X++PBd+eEf6g0qYkxmg1SJzL77IUYyITwN2wjoY+YSIU21qqSNO71nSAFOYrxo
	SQLKutYoBd74STYoRj6JUknAJq2a8yWYF/dSM7opY38K3M5cyfmQqrq43p/o+PoOk5H7
	uN4fC5vbF7s5f/F78s1/+h+7Oo0LhQnNyy81eTJNrKIFG0nZFoRQJjEMRqXjWBI0HDF8
	pNjAVhLDjqViJM6zt1GLjULnQDQSwcydQxWtqGoiDYKLSuEzI6vKSb83aH5+SGkgw2iT
	UpTeCIDWPTz1Jouijbw3ka6xoYQR3kXXanoe5BDTJa29EP1M25hTrqcgebtMrPzPVavm
	hEQb9UP/bgSPq1boNMQIRNk06nAU6hTCSMhZh5WrfqVV2o0CsRWiEqUDgOUJtaIXhIJw
	RG3z/Cnlb2w6My45YTfYmdIu9+TUh2HNMuFq9huUCIknllskYUjMt79rwYX3Bhl/lAGc
	xk43vQlDSkxgirTcT4FxrrTNAAj/rzyRqRBytJhUFfM5YYhheipXmE+yguuRjB0rQobF
	aEe0ymvsPhIjqV9hvo/lTNQKmIa7wRitDBWSkh5xmkAgDNRXoberVmxYbzGjGykj0oDB
	/EQ6PU5J04v3NQPSmTVqHzhvYPH8iDlMvc4u2gS7NaXVhM0cFcNQhyAp5lYaCSBloxBb
	QVgY/hCvHquhZIMMZO5pxYEeaW5Is5LrJtuS7IJohdJVZtdaEbtimj29SbWRoHXHIRMh
	Sj8CD5xVVJQWMFIfm5MeOipp3YTzA6Gb9nLATkje76GN+iHfnerp8ACHPDpaGykE4QIg
	pEcbRzj0SKzsl8A4BKOShI6MvO9SCr5CsAgnxLLup/LvbZxZFVbqyi3hRE8rP3AvR1rO
	PL3pe+s+9yEw+UjSc5cXTALgWGqFAByAJACGJEutCIBhziKUtax+KWtnNgwdZ/QjO3WM
	EAcppD75K1lwIOyeH5+aAHCkVcJ26MehHgecCpcAImHLRJwtOGlIomyRAMdcAu4jiZNF
	AqpWxm9Yi9nNgXXecvA7KiAOnGQ3M7Y+q7J+yk7sig47QjCa8MJRAqBrt0ArlwCjcN6f
	JMAQ5iP8IRk/oOW0H+Prd8IfN8w8fA/KIjZlAzocyrN98tE9+Q+VZaEwF9YWJwGFgvkG
	ieALVisyRlRjX5WQM4y7HCWT3tqUVvjoTMds1kZMoDAjBRUMAxnlTXEM8aVJa3LsAyHW
	KP2hft4qY80JObc59pMGxrOLFYwqbNkRV19nQdTPd2NY7DgQo4uNpH6kSbeB3UQrDk8n
	FU1wMa8AASxI7O8aS+8Zj630ePCIaD7HjHq+gsIZRrJ1Gq+SkJ3QR5H80rhBMgk+4ilU
	IuCYE61Cigg4IlZmEYixnJVoEkJyKtA3dsv/33kpUbPSMWvVnJDWEc1XRIc4BSqykgDc
	R4LAiueYBBgiSTUJMAykyHyFFMo6on5FAgwLTvoCjGn1Kk+Ys9ZbGRL71XRFAIJ2tgCn
	uQuAI7UABB+ylrnpSNzRNRY1TGE8Qv6YCCrBSW8sqH7AAOuvgnMfUTBW1/FkfJU4tXyt
	9/xLxGVDL1PuoXoHnpMfR8fT+kUucvK1/sN+cNeVaGj5W0Qlv7q+oxjjZ6Uw01T8Jz4N
	IW8v1qBIzE7YUZ7ktqjO5ODtvfTvGtvgc+MNyKe+N0E4h0eweCH1eM3LEAR7ajzsjRH3
	bk+VnET1PVBMYub1U/syxnhVFLZO3D6YxujTk1mhKHnnxRNnZ8IJOIeHq0vlvVPZy3l6
	RdF01ikG4ZpIyRreC8+YMAVRysAQ5UVzHQpWIppUVhue7o6joeAZLq7SzCCpsMuHLt1S
	yZqDPt9NqyrVQVpbVcoxbIoC56U0DsXqOIJ8PQbPFciWh67AiJeH4sujXIJUMo5yGV0P
	+3K/dBxvzJmDWYcqSgQzpbqg1A5BFr70oKohUuskULiRMT0MYzl4CwOOyJyqCZPfkgqE
	cMYPvdHmN2mRLExrLGeGAqxU9mRTOVZNpWhI8o/rqXArvXeOyD4sFKvEDOeKDw9gFeBM
	6KXK6cR/9RP/RzvepBqyDiBWlX/wxITFW0pspXm5H23xcX+wUXy4r/SKdEpaLcwlzKQK
	pwfHJ9JDitFTmKjbiMrUw5FXwOgHy9v48n7xLfi66oxKiYwRakPqpCCx9aYtccuw/DkO
	YYZEqzPy1iJa+zwTfPGxuFk4aXwFIn2zY6U+1xDakEZQUSxfKCiteKZGRJUKkAqhloDg
	FErDR9IR7ZKNZ1j6cAYShMHpK9Bloo95xDoNYZ1lz+kTHHdaWZtWn/xIbehHXTr6MSDc
	nH3aOe34URLhhQiNI77MwGwzgdiGAylkwaCoMKwGEc8XYLyKVRoizXBCHz0h8MbKDiTj
	5ksM4Ji1SjmE1MoQgqClXyUAjjmL0ic7lCowBFeGXSl+UAmA6iZw7AZvlfLxqKu1QqQF
	VQka/bCYcKw2lbuZAOjbGpAMK9oE3JEQAIyhq1aMdIVEmxCAaGTsjgUEkpdZM1LFBWkz
	zlrfcCBBlgrjrEA8wihZAp2+sbvgQiUA3i5bahEXvxf/g45czclxpzFviND0mPK4WXJ2
	CW1Sxw+VuQ7gHIkHApJjt1BKQ2wcsQDBjSHfWALitypwlXak0pWiCzjTpdIDHjQhCaNB
	6R7n8iM8kUozZujG3YSfe+r6uIY8N2+0Jt19uCA2k0G6k8tMqpFQuKaeyJodydfcr1on
	bzrjObdYeSRKCNIxJz+KRogyxCJKQQySwAAHGtFCSag+QXwaUtAYJ0IPEQsBZc6sFKyh
	cggjonoYDhliNN4+FEg2BG7hQFxpUUnGoO+NKCZw6vqYWNaebAB2ltXCaCoORYaqqXqV
	XyATh6ms3X2/gFNPaFARWd6c6jN+Kf6kGtWOq80xsQWbHBuAPSFZU/pgijZ11fuRZvPG
	vBOGGZT+QT2byrGYiggBDveEPZ03VabylmVX99NJMvsrQ0Rp503pX6UyZvIctZmekzy5
	+uLDIXl1cKeIbtxLDFrYppqR7C3PeJiRchys0HPYxhNEbiW4WWMpIzcWfs2Iwe/5pixi
	lf6SGsyBG35gi88SZml+rCeNtBWaEsVEKpboDyxM37fBd917Vfo79hNGB5k78YTILlny
	cUhH5Vbvm+atTH1vjJpkKqSWL02WqRrHqqkQPJQ2Ro2k6lbvB+Zt4bGSv1aZFOwmPIRu
	QOeSStA3JN1vwymV3/Zaec6FVQToOKMPhOrsnxOE5r0RvopyvjzB8Fmyd4jpeVeo2pfn
	hKoJyzhuqGKf3rGNZTzwFQsUrWoCiPjobKeviFDdw6MbjGusCBQuSoAzScoJRcsmpDz5
	hAdVVsqLbCm9lp2mG29FuBAWModDwxM3RaF1g+Cu7aikHgkqGJ8XJYBDXpgKQU46jn5W
	INY7WuI0QbS7l4d30NpIeuhq9Okci+mQNvS+8v+SrFu9s2TdOKZ3ojM3xC1Orfwxyt82
	iMkupZoPx/Ygbj/fr+mMAZX5S74m8TZdfmenJmf5edxzM8tfgs0oSA6Cf4JQMbsx3Rvc
	wIRJICJX1ZA+eqArU1jDhYBG1iO5gnAnk9xPmWBDCJWRPeQ7mzL4y1iqCVhXnEvdtPg6
	qUhAAI9Y0QF8bIGLOxoZ9gwS/RiLEgQVe8QC4DQhYSG2TEOoB/HNGGYbZqTSD0OjkMUQ
	rGfKiciskEswjAgNOToql3wFhtT7M4xWZc/PIFjPZXTcrky8WIDRN5ZpiPyZM/og/OCN
	FY/lBZBOkdEDg6tgTjNHnLKGKKRrAmBY8FZB6V3ZAZOIHkW0qW4kGInBnLH0YDHJjSG/
	1g/Bs2x1kkDZEPqBPHQRAEOYzzfjmG/YESeLIWzP6W+Ys4iVlxUY03wvzHfC9II4C47v
	74wc+mXi+QKcvrZMTM7CqYMAOJptsUM8+LFOqwwzfMQJ4mKQs0kCilfxWG607y1+4zbQ
	25Sh5mWrAzlZBVlUlFv6/GFEhaH4IrL8HUyTUlGBR0C6mSJzfuDaSrEq0v3ygNJTe1Kb
	FCcQwFQ3DgveA2KFBqa8VuXqBIB3lUeB8CknNeIso4VUG6CRE8AQKQ1ClJMSKjDMFD6A
	oCoDKJBmAxkH3GZ9YIw6K+bnut+ZVcUYxOVVBCAoVzuRvt5ULK6BeF1MiI02fNxZ3dAE
	C34Kq1SZEl9XYQlY8Ju8B5CNTzumVikU2+OQ4f9o3dzLpVqQ1hT9JGjGr8RUxxpfKCBS
	KT5KiekKAt04DR0Ja6aLVqwl1cbgg+0btz8KnmuUATTdzmWZEGJoiZhgnOGNsaAh+i6N
	hF+qRcEovYJXPy52rYD1oijz7tY9cVOJLa56fS8O9lI3L392XclB6/0LSSRHUj8+0ADN
	Akskh/SajbMjjl8JSgpCX4N3NF8KQltbea0yR2QSFUkTxPv2iveq6MVx5BSYpAnZue0q
	SVPZMTF7BVOLpKk0mddTIWmpVllPA0ScImmUS3AUVP9hkiYEfkBlkzQhu/LlIWn4xBBJ
	eX2TNDUaOjHHJA1pZZHGiiRogrjC1CgLGtW8Mvz4vYiZWvDSQ0tEXJKYCRoXybAJUPL/
	NxEkEG5PXrjqJghMPpbKcEzMKHfFOEySUMRMCAmKREmWIDEjLqIzx6NnjZTELHEp5S5p
	k8QslaeXbkShJGbYRdi5SYaLmKWQBN+lYwFZzHJ4Q4g4UMSsasXJRswEUM8ndhcxS/Mj
	JSmXUMA0Vhadb7UdzXMI+y6FO4gZUbyOnuQV5H0HmDpZWP9NxY1NPFo4FDfm2Hp6YP70
	AwGqHChc5lN/fE2Q2MdwzhmcfZzIG/rfPOAeYf8/lzrO2qsOb+eOc3N8VoFzR90f55Ka
	U7QmX+E52N1cV199BT6xakJjHmiiQwv3vyGYwHs7Yj98ZBkJppz97KXfrkAtz0fM8/MM
	6pFJnZfmynr3hFV6z3677F6+CYeBN47Yp6QriakREccf52hTNIJ/apgyyjzYwVFxhNgW
	nlz004nmWjtghNGsla4+jV4hZT76eSukmmSHnhFaPxQo2QuUbCBK1aIID/0gqLBYAcsT
	QnDMRiqI+vluDIsdGxJ0KQj7QxMUWlkrVHhBiDamFVSIr7PC8m54ZeH98o55CmUIWi1R
	ig/eBFaoFysofGhincYZKZ8z+s3WXRUfiYxZKr1MYSYeLpCTPVaRty//QsL/QeK9OMO3
	h8bbJnOrMylSokUPZ/Llhz/Ug8s+bNKTx2tRf5j8q6M+oVX1mpxqRD0Skma/1qoHN/xg
	Hz+lbBQf4f+3gI1xPPh8w/lJgeuam9qOw0zV+k1tl0If2WDOu7l9znWPILFYRFhg6W7d
	ievp/80Fc2Ek7WMYLinGL9LnSPrMJfdb1e9NIT9VN1SNHCAswDdTrAVWQwGqTopCczdb
	G8hyDcCOYcW7qDoViKRnmVom3k4b/kBZH4bIYEjdyxp5L5nidMq/cwzz71UXZX9GDHqf
	6ATgCO7cHvXqChSr2/lqHB8hqqhnCFM5jQ0LPjhSuNVg3uSR/DnEc6ltahnxQnADBlJN
	+prU65fGP+2iQLlHqz1P/38OuRj6TeMSWu7A/CrYnbTTffPwEFYPNLVM3mERb8V25ENU
	51oiu/Q+m//4V1+d38z/5eusTkkVAa1PCCvjXQLfRlPhBiqnfFcUt3UhG4hUGqZPh2Iq
	EqkqCHECKp+oXjZANwmhg5H6o8BSMCF9/opuPK4v8aWMIDnYDLLPFXJImDQ1UdAKkIum
	Qn1vwltLalaSfR6YjFL5HgQxCB7OJe/OphQCXPW2JmfZQVI0g7uQOKNjWCCYz5LzlIun
	lVElRkqU4osBnp7PrbYOZuV+Owkg+gVCPbtcAsManCEC+hQYGUJRoDwLWgUCofgQXt0v
	kRNzg8+bMbpWwAfGC69ArrinC++M3vfqGm+ssuld3/ghnmUC4JgLQIVkAXAgMzIJgGPO
	t5RCFPEOCF+QzN+nKgKAn0tQQozMAP+fU8QVB3lDxmxiFjA7e5GBSSgU5igCUHLqxBlM
	AEreXZGH9NAhCUBOs4O5AARihHUkBCDGEkOSAKhVeoB/QChpOjCSbBECwLVjrdgf6p6Y
	jiOYdlR66GoKwUkYgdQsXkkEncDGvVTinrh3EABv980Wj4wDXoUe3wNymkaOU8r/4c6c
	839/Q0T9PZGUlw+4B/4m73f/DybFucgKZW5kc3RyZWFtCmVuZG9iago1IDAgb2JqCjg3
	NjgKZW5kb2JqCjIgMCBvYmoKPDwgL1R5cGUgL1BhZ2UgL1BhcmVudCAzIDAgUiAvUmVz
	b3VyY2VzIDYgMCBSIC9Db250ZW50cyA0IDAgUiAvTWVkaWFCb3ggWzAgMCA1NTkuMjkg
	ODA1Ljg5XQo+PgplbmRvYmoKNiAwIG9iago8PCAvUHJvY1NldCBbIC9QREYgL1RleHQg
	XSAvQ29sb3JTcGFjZSA8PCAvQ3MxIDcgMCBSIC9DczIgOSAwIFIgPj4gL0V4dEdTdGF0
	ZQo8PCAvR3MxIDEwIDAgUiAvR3MyIDExIDAgUiA+PiAvRm9udCA8PCAvVFQxIDggMCBS
	ID4+ID4+CmVuZG9iagoxMCAwIG9iago8PCAvVHlwZSAvRXh0R1N0YXRlIC9jYSAwLjkg
	Pj4KZW5kb2JqCjExIDAgb2JqCjw8IC9UeXBlIC9FeHRHU3RhdGUgL2NhIDEgPj4KZW5k
	b2JqCjEyIDAgb2JqCjw8IC9MZW5ndGggMTMgMCBSIC9OIDMgL0FsdGVybmF0ZSAvRGV2
	aWNlUkdCIC9GaWx0ZXIgL0ZsYXRlRGVjb2RlID4+CnN0cmVhbQp4AYVV32/bVBQ+iW9S
	pBY/IFhHh4rFr1VTW7kbGq3GBkmTpe1KFqXp2Cok5Do3iakbB9vptqpPe4E3BvwBQNkD
	D0g8IQ0GYnvZ9sC0SVOHKqpJSHvoxA8hJu0FVeG7dmInU8Rc9frLOd855zvnXttEPV9p
	tZoZVYiWq66dzySVk6cWlJ5NitKz1EsD1KvpTi2Ry80SLsEV987r4R2KCMvtke7+TvYj
	v3qL3NGJIk/AbhUdfRn4DFHM1Gu2SxS/B/v4abcG3PMc8NM2BAKrApd9nBJ40ccnPU4h
	PwmO0CrrFa0IvAY8vNhmL7dhXwMYyJPhVW4buiJmkbOtkmFyz+Evj3G3Mf8PLpt19Oxd
	g1j7nKW5Y7gPid4r9lS+iT/XtfQc8EuwX6+5SWF/BfiP+tJ8AngfUfSpkn103udHX1+t
	FN4G3gV70XCnC037anUxexwYsdH1JeuYyCM413VnErOkF4DvVvi02GPokajIU2ngYeDB
	Sn2qmV+acVbmhN3Ls1qZzAIjj2S/p83kgAeAP7StvKgFzdI6NzOiFvJLV2turqlB2q6a
	WVEL/TKZO16PyCltu5XClB/LDrp2oRnLFkrG0ekmf61memcR2tgFu54X2pCf3dLsdAYY
	edg/vDov5gYc213UUmK2o8BH6EREI04WLWLVqUo7pFCeMpTEvUY2PCUyyISFw8thMSJP
	0hJs3Xk5j+PHhIyyF70tolGlO8evcL/JsVg/U9kB/B9is+wwG2cTpLA32JvsCEvBOsEO
	BQpybToVKtN9KPXzvE91VBY6TlDy/EB9KIhRztnvGvrNj/6GmrBLK/QjT9AxNFvtEyAH
	E2h1N9I+p2trP+wOPMoGu/jO7b5ra3T8cfON3Yttxzawbsa2wvjYr7Et/G1SAjtgeoqW
	ocrwdsIJeCMdPVwB0yUN62/gWdDaUtqxo6Xq+YHQIybBP8g+zNK54dCq/qL+qW6oX6gX
	1N87aoQZO6YkfSp9K/0ofSd9L/1MinRZuiL9JF2VvpEuBTm7772fJdh7r19hE92KXWjV
	a581J1NOynvkF+WU/Lz8sjwbsBS5Xx6Tp+S98OwJ9s0M/R29GHQKs2pNtXst8QQYNA8l
	Bp0G18ZUxYSrdBZZ25+TplI2yMbY9COndlyc5ZaKeDqeiidIie+LT8TH4jMCt568+F74
	JrCmA/X+kxMwOjrgbSxMJcgz4p06cVZF9Ap0m9DNXX4G3w6iSat21jbKFVfZr6qvKQl8
	yrgyXdVHhxXNNBXP5Sg2d7i9woujJL6DIo7oQd77vkV23Qxt7ltEh//CO+tWaFuoE33t
	EPW/GtqG8E585jOiiwf1ur3i56NI5AaRUzqw3/sd6Uvi3XS30XiA91XPJ0Q7Hzca/643
	GjtfIv8W0WXzP1kAcXgKZW5kc3RyZWFtCmVuZG9iagoxMyAwIG9iagoxMDQ3CmVuZG9i
	ago3IDAgb2JqClsgL0lDQ0Jhc2VkIDEyIDAgUiBdCmVuZG9iagoxNCAwIG9iago8PCAv
	TGVuZ3RoIDE1IDAgUiAvTiAxIC9BbHRlcm5hdGUgL0RldmljZUdyYXkgL0ZpbHRlciAv
	RmxhdGVEZWNvZGUgPj4Kc3RyZWFtCngBpVcHVFPJGp5bkkAgoVcpoSPNgHSkREoIIL0I
	NmISSCCEGBIUxIYuruDaxYJlRRdFXWwrAmvFgoXFimUtD3RRUNbFgg1X39wENe6+s++d
	83LPcL/555+/z38HAPQsuFKpGAUAFEjkMnYyK3N8ZhaDcgdoABOgAzyADpdXJGUlJsZB
	FiAplAiI99e/V9cBQlCuuhOyvl77rzMSX1DEg1zH4SjhF/EKAEDGAEDZwJPK5ABo3IR0
	u+lyKYHfQ2yYn5ocDoCmLpxrD++FZGDNFkgEMhGPwZZxSxhsbkEBl+Hl4cVIlBXmiMT/
	wWpi0//zKxArCLuJnxUc2kX5KbHw7QHtnyGQpKVADP1A6njcSAL7Q3xfKh+bDHEMAKi5
	Ij+NBbEbxPwcWVQaxCEQLxMqognsDXFHqTA1A2IoH0MlU+MTIA6EmJFfGEvIsYU4i1cU
	ngWxM8RlQgGHyJM9xNtkhckEvwvEZ/mCiEiI4yF+LpJzUlUYDysqTiHo0DZ8SakwHK4T
	uvAzedyYRIgdIf5NIGYTuqAcElUqTyRkwjnJWyKOJ3SFQVwhKFL6COekM3JhajSkewFA
	1pfLUom90B5yRI4oigNxFMRCoSyaoEN/yQ1SsbK2YEzI/TJFMuE79JHiy5VFsiGG8aFI
	+dwIIrZKO0E6wgUCUAimwr88IAHdgAGKgAgUK1Eu4IICOBjQAjc42JBLAocMcvAglQ0R
	F5QoEcH5idcD8jJAIlwtBDmQVwz3sJWyVBx8OGeAXKWcIshTpJwRsnuHZat0EnISlfpU
	UgiNBFffMFch3MdX2qeSTuxSyQ6HWiWgFK4RspXW4yY4Ex8NRxAehwfjTEj/ZL+7kj5G
	SfOCVUdo/WI7YWnfZ63TgOIr64lVdd+JOJ2AHsshVQyjKBn2rwha8x5KzR/erb4Halxm
	rnCWSquXJHEm1yktVsawXDZFxLu4dGDYb1Xki6AMVfR6lG91SYR2dyD9Yn1b2WFTwLi+
	+Pg5wNit23z2i+xOvGniVe22MpCgnn1lPfD/ln1oDekK6RLpHukaYMD3b6ROUi9Et0l3
	4HPrs9QveVBll7BTrWYQTMlJWMmC0RErVwsgB5EtgTJXqpwoIJbDSOcod7v/JR/qtaSq
	TPV8EVWh0p4L5apmajYoKUSVEPqJivl7/tTr/Otoq7Sp71GLdY5kmblUOrmubEgg/RwR
	BpE/wcL4V/Gg3I25l9nP3MbczXzBvPeFg3mD+Tuzk7kFrjzBVmIHsSNYM9aCtQMGnLVg
	J7BmJdqNHYbPvs/7vj4Zqjh/fTKIU8YbPglEBOTDtah+Zj6d2U85IeQQGSH4P8Uxb/iE
	/lOlEfH83yxSj/fXnUBVAcoY0+3onnQK3YXuQ2fREboNfLzoYRDZ0W3pcXQTuBpNd6JH
	0Ed8jsenrIkhhagikfJN2Pylg2VCKz9VG+GfEK7JlBzcYX//6iPjq/NE9DKR+mlEaPA0
	qjT9Uy9UqxKQBjWJwHRohwzGlegSEmUPVechujDRvWAXQiYoc6hec586mhXuiXNgR0sA
	DJyF++Bhw5jocmPgQ/Q4VcW646FwNQSPwP2J/kcOJDuRI8lOynVlpyFHkKPJUYBB9iTo
	5FHkGIgDCC65YAa8LwAQXigtkYlyhXIGC95MBAyOhOfhxvBiesKvE3HPIXgAeJGkvL8g
	xu08haxYRcOJFwlQ4R3IEJjBr6Id/MK6Q8v8QBD85kXCb3gCSAWZYDL0VAizIYPRKQPz
	QAWoAsvAarAebAbbQD1oAPvBIXAY9tcz4AK4BDrBbdAFesATMABegSEEQSgIDTFAzBBr
	xAFxRbwQfyQEiUTikGQkE8lGchEJokDKkPlIFbICWY9sQeqRfUgzcgI5h1xGbiHdSB/y
	HHmHYqg2aohaoo7oKNQfZaGxaCo6Cc1Fp6Gl6AJ0CboWrUV3o43oCfQC2ol2oU/QQQxg
	WpgxZoO5Y/5YOJaAZWE5mAybjVVi1Vgt1gDPcRt2FevC+rG3OBk3wBm4O8xENJ6G8/Bp
	+Gx8Mb4e34E34qfwq3g3PoB/INFIFiRXUiCJQxpPyiVNJ1WQqkl1pIOk07D39pBekclk
	Y5gfP5i3THIeeSZ5MXkjeQ/5OPky+QF5kEKhmFFcKcGUBAqXIqdUUNZRdlOOUa5Qeihv
	NLQ0rDW8NKI0sjQkGuUa1Ro7NY5qXNF4pDGkqavpoBmomaDJ1yzRXKq5TbNF86Jmj+YQ
	VY/qRA2mplLzqPOoa6kN1NPUO9QXWlpatloBWklaIq25Wmu19mqd1erWequtr+2iHa49
	UVuhvUR7u/Zx7VvaL2g0miMtjJZFk9OW0OppJ2n3aG/oBnQPOofOp8+h19Ab6VfoT3U0
	dRx0WDqTdUp1qnUO6FzU6dfV1HXUDdfl6s7WrdFt1r2hO6hnoOepl6BXoLdYb6feOb1e
	fYq+o36kPl9/gf5W/ZP6DwwwAzuDcAOewXyDbQanDXoMyYZOhhzDPMMqwx8NOwwHjPSN
	vI3SjWYY1RgdMeoyxowdjTnGYuOlxvuNrxu/M7E0YZkITBaZNJhcMXltOsI0zFRgWmm6
	x7TT9J0ZwyzSLN9sudkhs7vmuLmLeZL5dPNN5qfN+0cYjggawRtROWL/iF8tUAsXi2SL
	mRZbLdotBi2tLNmWUst1lict+62MrcKs8qxWWR216rM2sA6xFlmvsj5m/ZhhxGAxxIy1
	jFOMARsLm2gbhc0Wmw6bIVsn2zTbcts9tnftqHb+djl2q+xa7Qbsre3H2ZfZ77L/1UHT
	wd9B6LDGoc3htaOTY4bjQsdDjr1Opk4cp1KnXU53nGnOoc7TnGudr40kj/QfmT9y48hL
	LqiLj4vQpcbloivq6usqct3oetmN5BbgJnGrdbvhru3Oci923+Xe7WHsEedR7nHI4+ko
	+1FZo5aPahv1genDFMMv1G1Pfc8Yz3LPFs/nXi5ePK8ar2ujaaOjRs8Z3TT6mbert8B7
	k/dNHwOfcT4LfVp9/vT185X5Nvj2+dn7Zftt8Lvhb+if6L/Y/2wAKWBswJyAwwFvA30D
	5YH7A/8Icg/KD9oZ1DvGaYxgzLYxD4Jtg7nBW4K7Qhgh2SHfh3SF2oRyQ2tD74fZhfHD
	6sIesUay8li7WU/HMsfKxh4c+zo8MHxW+PEILIIdURnREakfmRa5PvJelG1UbtSuqAG2
	D3sm+3g0KTo2enn0DY4lh8ep5wzE+MXMijkVqx2bErs+9n6cS5wsrmUcOi5m3Mpxd+Id
	4iXxhxJAAidhZcLdRKfEaYk/J5GTEpNqkh4meyaXJbelGKRMSdmZ8ip1bOrS1NtpzmmK
	tNZ0nfSJ6fXprzMiMlZkdI0fNX7W+AuZ5pmizKYsSlZ6Vl3W4ITICasn9Ez0mVgx8fok
	p0kzJp2bbD5ZPPnIFJ0p3CkHsknZGdk7s99zE7i13MGpnKkbpg7wwnlreE/4YfxV/D5B
	sGCF4FFOcM6KnN7c4NyVuX3CUGG1sF8ULlovepYXnbc573V+Qv72/I/iDPGeAo2C7IJm
	ib4kX3Kq0KpwRuFlqau0Qto1LXDa6mkDslhZXRFSNKmoSW4I/ylsVzgrvlF0F4cU1xS/
	mZ4+/cAMvRmSGe0lLiWLSh6VRpX+MBOfyZvZWmZTNq+sexZr1pbZyOyps1vn2M1ZMKdn
	LnvujnnUefnzfilnlq8ofzk/Y37LAssFcxc8+Ib9za4KeoWs4sbCoIWbv8W/FX3bsWj0
	onWLPlTyK89XMauqq94v5i0+/53nd2u/+7gkZ0nHUt+lm5aRl0mWXV8eunzHCr0VpSse
	rBy3snEVY1Xlqperp6w+V+1dvXkNdY1iTdfauLVN6+zXLVv3fr1wfWfN2Jo9Gyw2LNrw
	eiN/45VNYZsaNlturtr87nvR9ze3sLc01jrWVm8lby3e+nBb+ra2H/x/qK8zr6uq+3O7
	ZHvXjuQdp+r96ut3WuxcugvdpdjVt3vi7ks/RvzY1ODesGWP8Z6qvWCvYu/jfdn7ru+P
	3d96wP9Aw08OP204aHCwshFpLGkcOCQ81NWU2XS5Oaa5tSWo5eDPHj9vP2xzuOaI0ZGl
	R6lHFxz9eKz02OBx6fH+E7knHrROab19cvzJa6eSTnWcjj199kzUmZNtrLZjZ4PPHj4X
	eK75vP/5Qxd8LzS2+7Qf/MXnl4Mdvh2NF/0uNl0KuNRyeczlo1dCr5y4GnH1zDXOtQud
	8Z2Xr6ddv3lj4o2um/ybvbfEt579Wvzr0O258HpeeVf3bvU9i3u1/xr5rz1dvl1HuiO6
	2++n3L/9gPfgyW9Fv73vWfCQ9rD6kfWj+l6v3sN9UX2XHk943PNE+mSov+J3vd83PHV+
	+tMfYX+0D4wf6Hkme/bx+eIXZi+2v/R+2TqYOHjvVcGrodeVb8ze7Hjr/7btXca7R0PT
	31Per/1z5J8tH2I/3PlY8PHjvwHpCOBOCmVuZHN0cmVhbQplbmRvYmoKMTUgMCBvYmoK
	MzMxNwplbmRvYmoKOSAwIG9iagpbIC9JQ0NCYXNlZCAxNCAwIFIgXQplbmRvYmoKMyAw
	IG9iago8PCAvVHlwZSAvUGFnZXMgL01lZGlhQm94IFswIDAgNTU5LjI5IDgwNS44OV0g
	L0NvdW50IDEgL0tpZHMgWyAyIDAgUiBdID4+CmVuZG9iagoxNiAwIG9iago8PCAvVHlw
	ZSAvQ2F0YWxvZyAvUGFnZXMgMyAwIFIgL1ZlcnNpb24gLzEuNCA+PgplbmRvYmoKOCAw
	IG9iago8PCAvVHlwZSAvRm9udCAvU3VidHlwZSAvVHJ1ZVR5cGUgL0Jhc2VGb250IC9Y
	SUZDQlMrSGVsdmV0aWNhIC9Gb250RGVzY3JpcHRvcgoxNyAwIFIgL0VuY29kaW5nIC9N
	YWNSb21hbkVuY29kaW5nIC9GaXJzdENoYXIgMzIgL0xhc3RDaGFyIDEyMSAvV2lkdGhz
	IFsgMjc4CjAgMCAwIDAgMCAwIDAgMzMzIDMzMyAwIDAgMCAzMzMgMCAyNzggMCA1NTYg
	NTU2IDU1NiA1NTYgNTU2IDAgNTU2IDU1NiAwIDAKMCAwIDAgMCAwIDAgNjY3IDAgNzIy
	IDAgNjY3IDAgMCAwIDI3OCAwIDAgNTU2IDgzMyAwIDc3OCA2NjcgMCA3MjIgNjY3IDYx
	MQo3MjIgMCAwIDAgMCAwIDAgMCAwIDAgMCAwIDU1NiA1NTYgNTAwIDU1NiA1NTYgMCA1
	NTYgNTU2IDIyMiAwIDUwMCAyMjIgODMzCjU1NiA1NTYgNTU2IDAgMzMzIDUwMCAyNzgg
	NTU2IDUwMCAwIDAgNTAwIF0gPj4KZW5kb2JqCjE3IDAgb2JqCjw8IC9UeXBlIC9Gb250
	RGVzY3JpcHRvciAvRm9udE5hbWUgL1hJRkNCUytIZWx2ZXRpY2EgL0ZsYWdzIDMyIC9G
	b250QkJveCBbLTk1MSAtNDgxIDE0NDUgMTEyMl0KL0l0YWxpY0FuZ2xlIDAgL0FzY2Vu
	dCA3NzAgL0Rlc2NlbnQgLTIzMCAvQ2FwSGVpZ2h0IDcxNyAvU3RlbVYgOTggL1hIZWln
	aHQKNTIzIC9TdGVtSCA4NSAvQXZnV2lkdGggNDQxIC9NYXhXaWR0aCAxNTAwIC9Gb250
	RmlsZTIgMTggMCBSID4+CmVuZG9iagoxOCAwIG9iago8PCAvTGVuZ3RoIDE5IDAgUiAv
	TGVuZ3RoMSAxNTc2MCAvRmlsdGVyIC9GbGF0ZURlY29kZSA+PgpzdHJlYW0KeAG9e3l8
	VNX1+L1vnzWzb5k1k9myLyQkJJAxZGMJAlFIkGBYAmGTxRCBgkZljZTKjoAKallFhhBh
	gOKXIhRoraJFRarWVrB826a2/QJaYF5+574JEfKz/fhHP32Tc9f37jv33HPOPefcl+a5
	8xqRCrUiGg0fM372ZCRd/QSE6BUTZ46fHa/rmyB/Z2JLszteZ4PQP2Py7Ckz43VhPUJy
	x5QZC7qfNzyPUPKlpsbxk+L96A7k+U3QEK/jPpAnN81snh+v6zog75gxa2J3v4H0j505
	fn73+9GnUHc/Nn5mY/z+wiuQJ8+e9Xhzd53gt2j23Mbu+3Et4PcewtCajtYiGZqOeEQh
	DfzqEeKvyR2IgV7SD1ff0vRbjyYU30BamDZcj1b/RMrf+8dfv/m28U5AsUb4JzTI7t5P
	ci4khhBSYujvVKzp6ZGegyQ9impSo2gQQAlAHkBq6gMW1Ip3oucBtgPQaCp+Di0AWAnw
	AgDTU9oDtaP4uXZGCB/DC5ANDw4rGNdDBqvLIle4PohiruMl1yeWL49jK6ze77G1XYVk
	D8jxdvwymoRc+KfIhxeiKhTEWw6FZrgaoGsPmg3QCkBLKcZ72p05rrdwGvIxGJ7xIyeD
	D7v+mJ3uupodpXC761QgykD2cyfUwgmuk46XXP/jmOJ6C2BfvGtvCO447NrjmOFa54zi
	Le2utY4ohmfWxLN5Dnj0sGtmaKNrUrbUP3RjlNrX7iqE/lFhhSu/wOPKc1xxZQaiAoZ6
	umOoKyX7165keBBuc8OgvrDWZXesc/WDLqejPNAP4Djei7eiFLy13TfYdQyKMN1Dg0IF
	G6P4R4eqgtm+KF4Yzq8KbgxVBXyhoS5fqCIQgPKoc/wS/hH+AT6HT+WDvJ/38Im8QdAJ
	GkEtKAW5IAh8FL/eXuLijuN9qATIsu+QwAlsFL8BjcxxvF9q3H9EYARKQIIh2vUFMC9G
	hije16EhJSgc5qQSF8X7D8Wb9oddDCkxUoeGImVIIEUUFig0GEXwj6McWmpqKbGU6AZo
	CyvK/lXSIPXcTVP/9WXBjsjGITW1kb2OukgOKXQ56u7ebrlb+Jd58zzoaixNTR0ycsGh
	ltnTJpc3essbvOWNAA2R51qaLJHWCW73wWmzSYc7QvsbJkxsIvn4xshsb2NZZJq3zH2w
	RXquV/dk0t3iLTuIJpc/VHtwcrixrL0l3FLuHV9Wd2hC6dz6+961suddc0u/512lZLC5
	5F0TpOd6vauedE8g76on76on75oQniC9i0y+fGpN6ePNwJ3u8qlD3JFgTWTQiDG1Eff4
	urIo3gmNZfMQexJp2BMoyLYiG5OJXAh1fQJwmeTiw11fsWeRRpzZ9Xe6CBb1KAFKLClG
	J9GP0VZ0AHFoN5SDaBzajM7jaSDbY1EH+gg7UQboXgZF0VD0Du7qeh9NRq/B/c3oFNqA
	DiIlPDMTGaF3NfZ1LYR6GMoT0JKuV1AyKkDL0AlUCKOuRp1de7oOQe9I9DDai/bB87/C
	Xuogo+96o+sKEtAIGHMJ9LzfNbTrANKhNFSKhkPrEvQW9tGXu5qQBRUBdtvQy2gH+jn6
	C34Gd3Q1dbV0Xej6PbCqBdlRDfwW4w78e/oAs6xrW9efukSgRBClwFsb0Dr0Kox/AH4n
	QbWW4+m4Ga/DG6gw9QzVwSxlzWIM6BBClfCrQrPQCqDAUXQa/QP9E39NWWgN3Uyf6crr
	+j+kQENglmQmjagFfsvhtxrmdBxzOAsPxMPxYrweb8C/oVKoh6la6glqPvUVPYweSy+g
	f8M8zrSzq9jNnEK80XW862zXh8iMHOgRNBc9CbM7hS6g6+gWpmEsO/bhIlyKx8GvFW+l
	juId+Cg1HJ/EF6i9+Hf4S/w1vk2xlJIyUqlUM7WO2kedot6lp9Ib6Bfo39E3mAEsxe5g
	r3I+/rfiBHGl+G5XUdfvu74FFSsgD6xMKRqGHkXjYbazUR/0FMxiP/wOwKqdRmfQeen3
	JbajTvQtUAFhHbbhHFwNv2H4QTwZT8Uv4WPwe0vC5SYFC0HJKC1lpuxUDTWBmkm1Uh9S
	rXQinUIPpsfQB+B3jv6Ivk3fZlhGzxiZSmYQWsXMZLbAbyezm2ln3mML2QHsMHYU28qu
	ZFfRE9n32Y+4J7nVXDv3Nfc3UItD+Vn8Klid88CzPwde/u5icDJgn4MeQxNxGZ6ANsJq
	7MDjURtw1yS8Aug1GwW76ukn6UoqC7jhLfQj4NYtaDFaSY9FO7ou0XvRx8ApM2DIVrSL
	KUUOdhOszjMoC7io+xcOpYSCAb8v2ZvkcYPKtyfarBazyWjQ67QalVIhlwk8xzI0hVFa
	ubeiwR3xN0QYv7eqKp3UveOhYfw9DQ0gyu5Ixf33RNzkufHQdd+dYbhzcq87w/E7wz13
	Yo27GBWnp7nLve7Ir8u87igeM6IWyj8u89a5I51SuVoqPy+VVVD2eOABd7mlqcwdwQ3u
	8khFS1NbeUNZeho+GgZyyNPTiOIIIwUZOIIGjl8MChYNJHeUR2zesvKI1Qtl6KN95eMn
	RYaPqC0vS/R46qANmkbWwjvS06ZGAE/0nHKSd9Jz0TCa0EBK48fWRujxdRGqgYylTY2Y
	vWUR88Krlu+qd0vlq+7pjFC+ivGNbRWRcMNzQFxSbSC18augNqTGDcNSS+tqI3hpNxIE
	x2mAKUE3vif4Gqa5IzJvqbepbVoDEBeNrG23hW2S8o2g4bXt1rBVqqSnHbU8WeSB2R9N
	fyD9AZIXeSxPxvM/Phtv/+AkyS1Pnv4C8iEjewiACQW8gwDPiHui9BIvIFtAksYC1Dax
	AOgEVx2GaU4FfAZGKOAZ2hdhfYPGR1pr7qLRVBZHrmFaWbvMapM2odI6uL+hTdMPVgru
	13jdbTdgt27wdv7l/pbx3S2cT3MDkU6y0D28EsHj75ZbyGbpg1k3WbxNZH1bpDWFutdS
	fk8D1AlpCM4RA2zgw2s9EXcdNIA1mTYkimTDaw9ivLouiruWRlGZ4yjYqPSj46A7jbDa
	1DJ4P1TS06AhxQOljDR3Bby5gvCKu83dNmhSm7vC3QTMxPikHDoa2+oygYI1tUAn9BC8
	MVyX2FNsrKvrB+NkknHgEbi9rQ5GmNY9AuRSU2YMbspKg82U9g+vHVEbaS1LjITL6mAV
	gH1PDq+NnATOrauDu7J7MAWMF0+1dOOcAzhnp0B/bnwUsF1aYYi6tjYyZk2t1xM52daW
	2EbkLV6PYtS7IdzdEEXkFkLyKG4dDs9C5vUkSmvg8XoArTpC0z7A0nc5Cmz2f0/h/B68
	4cm+gG2+ROGC/xCFC38Ihfv9IAoX9WB6H4WLAeciQuH+/z0KD7iPwiX/nsLhHrwByQcA
	27BE4dL/EIUH/hAKl/0gCpf3YHofhSsA53JC4cr/HoWr7qPwoH9P4cE9eAOSQwDbwRKF
	h/6HKFz9Qyg87AdR+MEeTO+j8HDA+UFC4RH/PQqPvI/CNf+ewg/14A1IPgzYPiRReNR/
	iMKjfwiFa38Qhet6ML2PwmMA5zpC4Ud6KBxOjKB79XBrL7WL/uOKeew9JAdLidWhUqoQ
	HOe9aDVAGcDDpM48jk4DhAGyAfoAlAIMITk7CjnBRxsD+QG49zy0beP2ok1cIRpO2qCv
	A/IG5kvkgfJe6B8J0AJOexHkBQBVAP0BluCzaAm0t0K+EsZYQtoAyH0tgMtK6CP4maHe
	CmUFgBHQvhtvUoIX9BbU3WgMcf/vuyjwHOIXPIRYAA4iVwLs63IoK8D/632poEENkNDd
	AfEFuLTg4SGkRwZIjcgEHpCFNH/PZUU2lAi+nQP6nODNuSH3oCTkBf/Sh/xQC4CHFwLb
	PBXKCPxGcuXD70nwDj7HFA7iDqqBeoMupVcxA5hfsmPYl9jD7OfcNO4aP4A/J6wXTsnk
	sovyAfKTijTFTeVLyr+q7KpVqjfUKeplajFhdsJhzUbNV9qw9iPdDHBwSmElL4CvTcPM
	B8bjaEJmFDEAgiaK0AUAUocy/SmUIechpyGXfYqOwVMIjUo9BiOxkGdl52o92gBAKbM6
	eucP7IlbA6NM9W2IywD1V4vjqPHsh0CnAWGZQSvTm8xmm+w43gY0N+BtYXUYlnCoxmo0
	feOZMdIS5XOWpqYOu17dafvM1nmxc1h5Y9lXqKQkOwtTPKfVmE16bwYO+AP+PE3ffD01
	7sXMyhE56xasrQgVmBT1RcfZD8X3nv+t+Hvx87+tF/905ckZ63ePfhAH/7gO+yR8ygAf
	M+CjR/lhpaBFeiPgwwxN0BOUIAQJKMkEq8H4jafkRxDAIZhc7PzsHjz0ur75Wk3AT+c6
	sdmJjRqeoytfzqggWGx5wJ8VGld0TByH81d/jD3Y87f12HTz8cbF1+eIl65tED+XcHgY
	f04NoTYB/d1hOcqksY1FVgYiYKWHPMeqyFuvaL5CmdWd2Vl6j9HzML4pyqlNJOYhcTM1
	TVq71LCZx2a8CRxtirLraBpRtJzEvGhrpuUiKikuKWaXZ6Qu1pzG9TgXe/EHm8WMzWR1
	yDinQbo/ZNfCKngPCjiKc8NKhuGVDL+RRfJKmabltOX0h7FCIP31XwMaeQNw31ytV3v6
	7S3+1Sfpm236up23HqNvSjiFgZ+c7IvA0zvDw/KZCmY0O93xmHOhcwleTgkpwhjrdOsi
	6yL7m1YWJeEExq62eni7FWKirCshIUkvz9Ozbtc8T5LS8xRfYJqVpA4kPO0qSEqu9BI8
	LnZe79Tc6LwCU4oVl3RqdYWZOnMhhlxXWKiFBNVnZw1cELYzVqVP61fo1EEkM/BBbGVU
	GnkQC0ZIIDqs0WASjHoa1efrSnB+3/y8Pn5vEs/xXih7cnRGA88lYA4agOiDl/785NN9
	Rm5cfLTSzxyhS+fh4M0vF1S8uXJCwSQbrb4TOop1s2cNyauZvnjdqiFLj7dcEG+++vrC
	ysah+dmjp+2V6JLd9QljY7egbHQ67BqkrElvDE1Mnxeal85t9OMhQqrckmpQ0f/MNuSp
	wMH1hg3aPM1TKlV2Yl4yy+dlqywbA2XaKESmE+QFGbMoV8j9NB2gcitz7qEK0AaVdJZ0
	AlGux77SdGoIfQhtJJLkZ2ZZ/UjG+h2+JD+H6CBiaCELyGH3uoLI5rMEMYN5IFcmJE5P
	ItDMDwkQKzWVEEtTTEpPPw00w/UMlZdrMptyc+KE4/g8J87NuYeMfQgZIYoAFATBMCAv
	Nl39mTJYcWT162/u0Pn0dr+p8YG5mxs7yv1se/gxbPzt3yrTKuY8Jf7j2wA2n3uuZM7m
	+etbMH6ZptwFz09vnl+6cPvsc28fXTIy1+E62PprUQSyAoPD2QWTyW6DkgqNDSfJKLmg
	Ahl4S8dxPMVhlhcg9sTLqXkK9mtayTN0FJvfxBtVwuvyKK49xCZUqiUK3rheHAOuKoGs
	WFsoUQ0IVwhCwyzWnEkAnaOVYa0nD+dqc41eLfVTMQ+/G1tFPb/5N7+BsNXK2BMii8dF
	6NV3Hn1RfIXghlFp16eMnW0FLX88nFqlW+GiCpUV+tH6KXqmn6BU8UgpT1Cr5+n0ep06
	wa3T80hvlpvzALGksE31lFrt0PVLYJg891mHSssX2GahAndSpSe+4jc6T8Nid5bEYLWv
	XL+70kQMJEE/g+JLD2tvAXkIWlxYRvlpJ2wvcPzgZu0gEzILJNjFBBGXCIlgjcsGWW1N
	MVlustb1oKXvWecA0UI0CEluDmM0UJ6k5EBMtzj80PYtR1rrl2Zum0ldi73cPyd9+NQz
	WHdb7Dwg/p8Gz9xS5Hxn0cbXqsIymn5DnOvXe8S3fyX+8sw7Ep2GSGvYCrtqTTifVVip
	AkU/ZaFqsOphahQzgTrCyxepOlRnVDQlwyp1P5TAyJSUCo6PZqmFAtnram2lRqIJqIar
	ZNFgGWEVgRQYlEE9NnKwXRDR1unz+3rymMzyq7Wj0x0ZZ8uurdx05xrb+uJAsePk8S0T
	P8Vb8Ma/7n8TjrNg7T4Ged0GVoAZInC/CleOwqNlYxLq9JNwo2x6wlT9Ez7ZIM2PrC3e
	ub7HA4uyF+WssC53Lw+syFiRvdmqqhRyBJ+a8uUo8rTaNDbPyZrz0lRUATjDy46oC0Kz
	MoWCRCi/aSjI7FOZe48QfyfDnXE27BbfvJQMu1tnolWmdEMQKVPVQSzXCbB0DkgYFxXE
	xgxzEKlSIOHtbBDTbkh6pFeS3KdxPRzJdYus0WDK1d1TRrCP9oFljQstLDosrzcpGdr6
	Uq8ta332meaNk1f8dO/Sp1/dsE18M+XBax+++6cy//C63EfFa++Lv1u0kA4vHTt82bIx
	jXNjRcuXPff8umdmv0ptTx3euv2rT9Ysq8lMD+VN2n5C/OeXl546mk1o7ASjqz/sXxTY
	Wwp0OTy8CtfiJkyvoDcxm+V75FFZVM4FYR/jOQ5TgkwGiRzxLF6FacZtkMt9OmgzsKwP
	pB0rFCwtkzMcixUUhg3QyQtRXBeWQeiSk8lpFmq7wzqVCvZ49iX8ktyqVO3wrBoHW6x1
	2HVLdSxmlQyMijILKjHDhlkdk1RBCVGg8d0lU5KsIRBhYU4mRpjTdcszLLCnkgYaGujT
	dand9y7XFBfzAKA26oHkWIH1sOvSHtqL6dW/61z6e8p4eUPs+MvvUM9TY4jyoCfeGoij
	YpVEjTFdl9k57FXkAAodDBclspvwRpZ2gaQ+g5ezK/VsjUAvc2i1Rq6fg1b2M8qclNNp
	pbOpIk221uaWZVutLvcOz7TJ3UbLMM3NatgbQFGAZMT3Bw3YE6AW+iG72af3q32JfoVJ
	loNUBk0O1mkTNLwdaiyiczCmGFpuUeagBB0kgo3LgW0CErIZ4LiaiKfS7gBbg4DNYJZ5
	k5BWoyNbQt9cED6PO+DXgpXm8TJO3Ed7ynOm/RPxxt+//vTx/s5TtrUHxI+70BtXXz+G
	K4PsVfHy8dU7xffEM6Io/s+eujXXXjyx9df4dVx+4Q+gLyiIiSOmEyhFLPRh4WTeyTAK
	2gnmjkxwyhWCklIqKcRNpYpkNjUt+JBVpY5ixSHPhpVxgsSKCUWuX4HFIhQhlkQxoU4s
	bmNpQcMRwAeYzDvr6NQ7H9KLbp+iXOyJDrF0r6g+AK+W9NZ5UPJroUIjMzlxPgaaFaGM
	VDhfIiYzlZmVrQc76fz585KhheE8BDFD4H4WZYf1YKFRToYVaBuPKR8YfRychdYc8rQQ
	jhx2nbDfMLD8JD4EkxdGApS2naWu3RkBw/3jALxsEzgsZhhPD/qprgwPAUbHMtqErfTH
	mNVjO21QJCpH41r6Iv4tfVHxW6WckTOqcmoZxYygNlFUSB5UFcgLVJXUaKqF4n2TVHKK
	1oEJqVDqaE6QrGFiim4Nq+QuWsHFlJiKqVw6aDmsR1ZDy2xL6jANQfWK9XphIfxZrhCs
	43Y6kSGwzeA486BKGcV7OyhMyRVQaKcoejlbnbEwxiw+vZyN59lZqH7uHDy3fo7eI8Me
	MC/75OeBoQpayqj1bsIOvBO/im0nGLH+jDiGfYs9cdvPXL41kJ6YfuGJ2yHm4/T8z/rc
	eREWAL6t6PqQvQbykyD5Wm3htOXgZJ7Fb1PnhPNybqBg7JdAJ/bjZXbKblfosmmb05Kt
	sDqcl3qJTI/ASLKSg2wqP/bJfKzfpLbkgBejy8E2AUoaDkpmpTEH6ylIrPLEHKRlIJFk
	hCTkgr0UmU1aDU91C4POg3R5GkQkxaDz0MzW42t3nRY3iPtP7V//FhznJf5Z/Pufr4hf
	fIONavbqrbfFC+KRy13oi0t4ME65iDW3XsELboDFXyyeFd+7Lh5kx3XLxrfAE3LAb3w4
	b6pyqm6BcqGOqTLUGpoMCw0MLzi1Go0cqxOIxMgFitMpGZnBkM3YTAkyEBaj6XuEJaaF
	pYzLigbIAiIj7a16ycbjvLBesH1A5gGD8AC14fTfPvpczDlLt84vfVxsxquW7WJPfHbu
	9a7YOuZoP5dIz32eyDEc5bPzAVcZeL3rwzpeNQhXsXW4lp3KTjLMZwXTcTiAtKJEbA+X
	ej1uf4Nujm6egdY5XQa7kfY4TQbGr0v2OZFMlsg7FZTfnii4fUaXz0RnJ0xNtIUEvy8g
	twZDH3k2xHVhXKpA9sGRuwjGcnGxZD8Ra0EbdyOIpq8HxZBKVDcm5q00L9qTQzZEYsy6
	MOyNZiPouEwMvieZO1256tW5/SeLtrPU7t0z35s5YdRolqcVuozrciWj5CcVLhSLztL2
	2WtfLHSC+7Yje1xsye5c79zWMw+FKgweffGoG89nJ8bagCYNXR8yN4F3M+GMTgyPCyUE
	vH5/vjrPU+mf4F+ofiJZNl2wqM0+qk7dpN6bRMvV/ZKSk+Q0Y7csM2Rmptr7GWimX6os
	i5KrBW1ykiuYlaW1+MyDBF/QluPyaQchX6Y1O2e7Z1q3NoSd4bsNQge2L4F7Ngqy8hmx
	3Po5khRUBzO0LiRQfsqf7uN8Nj+dBrGK9AwpY1OEVOzQu1JRotGSiq0WnM6kIllAkYp9
	CpwBZT4EiVNnh04TJJKEaDTSTkJkJO5j3PUyJMOT+BQBv0TqvD7JxOr0EqoncUaD2SSt
	hdHAeGF76Yuxk+8z8dbsse1Dhr5y9u0Rq8AA/SMeeDwh+5HLkS1jii68u2HEKvHFP4t/
	3bqVpqrx5cXD1roHbJ+fm+NLT8sbe+QX4u9utJQ8vn7CjBx3VmZS0ZTT1z9Y9dxfGQWx
	5T2gu0GPQ7yjT9iGOSfiKUaQgS2BblO0j2Vuc1aBGBOgD6uJD3H9brSCsBzwEmwpXnAf
	mPOi9peilj1x4NY/WDVsZEQO9nZ9wmbC2CR2VBz2mtkAW6Ch5Yhi+2lkJtpkMsh8SpsF
	+wxWs2W7ZwOoXSkYIS3bXSVVDLYu1gJNJDdMmxtXNLTfCqGH5uK638Qeyf7loGXiKnHV
	0kHUQPbEnebt07bvH/cyverOWfHva8WbWL4WJ9CFoD9Hgt9CTrIT4BuFYvRZuCAlC8s1
	sJfYA7lVmqmyaRq+UNApZXRiDp8sc2iUjqJUKiNUdKSIKspJ8ek0PCvYA0lmexS3wXQc
	Lj7gyFBQjjxFMV9cbDfwoZTdybYBiSH74IRAgbX/gJ/hTUDgo3gj6p5ZnCWvxE7fnR1Y
	LbBDE1YkwpnRmdFJzDKQWYkpg/l9jUkIW304P8GDLM5EDzK5DRBySUJ9KQ+yOcweWABI
	CL+B0UJYrduRTZbo1R+rseTuG++LBQwAnxbEXguWcg68Qg1WDYSbSEZM5b56rJ477NG6
	jZ6mnJkTsmtwxwCj8tmFPy7yyHez37x6omWe2ad0alPS/PUpJlnfdxdtOHFsU9t7Y9IG
	7VxjtHNqlT1zCp4hpFnSx9YMTan5xdaqqs2xTfYkml6q5Eq94appb67Y8JoeXyE80tL1
	OeNjT0Gs0YlmhzN28rvsH9vpJCHBSUHg0uxgea3c6VAoDAHB5rZlaDJwCGnBDFzuOVF/
	16C4ckXiGBIjgD8txEsk6ll0Jk5u4gx+rJNDYuTNfqyXOf1ALLDyiA8IxgchhU5LPAKg
	gNGb3OM4AMO1HCh6reHcP29eXvhQTuFOavKaNT/+0VF/5Sn2VOzP1SPETvG6KEaKvNUr
	F197a8/nh9/fNO6gxPfw9QZ9gRkmxUR3hTN3WfFmy25hr4UeLGi3GmjawDlsvMoBVgyf
	mGjWBHQYQh5am0MeMFvt8Ekbf8gzd/F3slBcDR7T91m5fZBV8CmNcj9S6zUwS2LfWqEG
	9q1Hsm8VJpUf7FtIZBbOT+xbz/fYt1LgA5ni1i0P+kfiilzCDhTs47k89dGX5gOauU++
	PjhrxdrZz1oPOP92/INbWHfRzgyLfDzx2d0zt+/4dOUTH57BuV/Bpyf9WFjXgq7LdCes
	qwI50BPhnL7qSvVo9S5mTyLrEwxUgkODBIeD18sph1nBZugzNCGtzuZSBGxWp2u5Z27p
	vdOPXYEIxv1ra7PYZXKEsUUBc7NDgqyUH8kTBT9MUFpdmJWOTEQKgHFGMFHMoDy8eWRa
	KK+PLvfm2h2Ld+xcuGIPbqvJ6r//lZLXZx0Sb339OX702sfnf/X2hV9Sffs4h1COWwM2
	TKzF6bf+hEeDDqnquszYQIfYSWQbK8MLNgkv2Ha5aFZNJbAGo1qXYDSElWGDELLhIYrD
	9Fn8C/ps4iXhE9lHrkvea+ZrXsVZ7VkdNVZgPckJW0yO5EKO500eh52XO0wKH7/Jvst+
	BGSA8ZkSfHbWKlfyWogVOgKsLZCcwQesVn/gomdnnPnBQpVY/2JM8uQkhy6zvmeTA30t
	xcokcahAXoal4VMjzDKcC7wWnUavMWgYTulLSkz2QzTH4cdOh8zM+5HCqPZDSMJr80AT
	C4lgAb6CSCMQmigZSddI+iYlNeVpPKcezQF/kNgPJqMnHjHrCwxEwhOSw4RyJZMiiQOf
	oOOjgnyd5s7X7PObfvxQluEg/2D2yAUPjDwn/glb/oBdiuDg/Yt2s9jLVE5/eMSMwa+8
	eqY+v7JoTcZwuwbsZnCYcanon1fxzKE2TD7ohTXpLxbR12BNXPCdbgY6Eq7ONwwSBslq
	hTrZCuWexN2OPYGdqUcTFWGBNiWF1KflSaC6GS7ksMp1DnlCBp+RwdrpDFNGeoi1ZSnV
	AdUAf8Buzcy6hxGvdxYSSseu3Oj2rkBzg7aRyBtXN2neoM2p0Cb7NH6v0+9HQRskWoXa
	gxLUSpXPkeTHgcQQyKMSDORuhd1tF0g6m3BoXq4WIoueJH8gHoXsmy9p5WQtiCGSArmS
	dILtgKlF43LzdhbPFs/v/4v6iCrQ/9n3wn46f/PiN8TbmD+Gy1576q0K37pFpx5ME99n
	Sgd4By6/k/NOy+WtP60KFK8d9dnI4d+A86HCGeKOk+2PbnnzxIGJS6h0oCeGr/mQJLsm
	iFulAXcKZt4sBJiAfh4/TxD0KkoPJ1FaB8cblXJVSA47uDGETLCHwxfFhzwT4rJ71yQl
	1qiklQsxifhISlcKs5ENCLyhuM2j9S7pCOeOfuZ/a9KPOrOXzz7cAUr20xGewlfrXoqN
	oF5t6Vu75aPYObLeFMEPF4FdQc528sN2/ioDSHO0nJgtwB8hngbFKNv7HSanY8Wne+yW
	EunMgQT6IeC55AhcTMrtj9gT8ZhdK8yd+BkKtCs8qY7C/QRspYCRzdxodgq7gJvPL2eP
	0ufpy7ScZTn40FdGU0uo9dRr4PYWQtiGYeGjMm6mDqgm8PB5GcvJBJaEGsDOojk5z8k5
	mwqiuSGkgEBNu2fCUWyKWweEYMVW8I0hTgP2e3EJsQowwPLqjFRhsebnDAnL1LOLNSc1
	QrEgxWBA7ObCJoZzZSAavNbbuh+/+5U4GR/8SmzftB+MoX34rDgrNoGyt4mPSWu7EmhH
	YlM0CoVhFWEWQDSgGZyoMOw9JAN/t+dYinj7Kzs64scqcf7gfEwlnOstDRfxAq/mEsyC
	WW1OCAgBUFVV1lGKKQql1ye3ObxWOcWYfR6H2aHieIjH2n20Xh6Ed2pD8LEzbreFyDfe
	cESEM3wgHNZAMIpV9zLRFc31zuuxbmTA94bAQSdEhe8ejsQ5ytjNUea7lg0wlmRL38dh
	7eE+dXNah6UlF7/SeGlYyvHp1dNeOGILzZ68q4PJ3Pxgcv+S5IpRNdseWh3rS12bPnz1
	ztga6vjMnCEvvUc4T+I7uhP0DDntHBfOPsKd5SiGM3ABQwvXzLMGJWWwaMBiQZxFIbfx
	NhtShmQ2O86whKzImghm433iEVfdcUsQ5tVJwvNxEcFgmRjvmQqREdClagwSg5fsG7q3
	6crwtCOOrCfDocEF6YkdeBfgP27ky6NfIbIyoXiSylSaN2dq7D1AFla6CM5oPGCPKOH8
	1oqeD+duFjZqXjD9lNkt7NTsMUWFc8LHzFX1/xqU/QTOYeGVDp3CylutRiqQYEuUBYxW
	G8R0ZWCVdO86cceqx4aVtpc0OKr2K/Qy2CG0lB/zZiixKijJDUo/whpIBBMYIbQaEmkP
	IQmJHiTrJGeUeD4QuYXwGkTfUdzw+GJp1tBjP9248VX4yPmO+M1n4h2s+yPXjBN2bhy3
	/k77viv0ZfEvYIbFxDdw6h0wdsPE9mgRH2Z8MHU1nNY1h9P2CLvMVFBw27VqzmHkEzi1
	w65IUlMBiy1ZDhalJ5SUYPUmf69FKSl5cv4mzdFuSkSszc/4USJMjDVBgq1qP6LN0pyk
	aRG7kliR8TUjzlwuzo3zJ3x4SvZDMDS1XuoXu3wVx46X+yAVMw7khx/50WHxSPOWBSOz
	ijoW/OaD1rEHj0/asmj0Tvrg6kHBYvF/YY6vbHw0zzko9hnR0SDH1FqQQS16MOwP0H5V
	X7qSYdSChlLLtDJlQCBsqJULNj0mthWy6vRRXA6C9WSP1SyF4UqqS07HTsOe1n2gRvSz
	xHoQCsgAU4kDllu5z/jadNbi0CRqVqwFUTmav5Wi36KpA3Njm4lcwJkCfZgZAntvJs4I
	/6RAtpndqHvBsNm4OYULJvsC+Z4KT2VyZWBU8ujA5OQp/gXKBaoF6hZvc3Kzr9m/07k7
	TU+DycGmMxl6ZDMmmu0WY7ohI5igmAqRjnwf5UtSyZlUveUXdoeeZxwZW1IVmbxMraF4
	lOnJtLksJkvAPCDo5wNBW7baFdAMQIEMa1Z2e4+dBCokvn8XaqBEpluYSRyteESAeGFE
	pcRDAUNxOuU3QgjAo3Z5kAz+vQNDFMCD2BQoOXTQlmiweLA7IcmDPElqlRCQe7DfJ5ND
	VMAD/9MDiVNr95BIQNwzi586SdFkiUXuMj4ElXsOoXpCAfnENeP//1gAMI4/gL8WfGW7
	J23uH3j8JysfaP7t0X9MH0jtZf0DXpg8tTw47IlTpVM/+fzrszw+goePyRo9+pHyZLAw
	k1IGPb35Z6vHNPXPqRwWrkix6h2ZaeXrf3Lhk+3UP4GXzF1fUzJ2DGiHkW+qMuQn1XBW
	XhL2MaZCM82p5VobqGs4bQwho9qYQLtoir5jslptdzxTur2UWH3haRI708TVdCZR0rHi
	Tk3sihTgJQeLkgPf7Wv688AOz919eN8+vzFb5TS4BgaeHLNmDTtG/HBdrLxAr8DUapnw
	9BTqzDppv2/t+pL+HOSZfH8yLtwvajhnoGR6wWDVWw1B7gn6Y9hsEauWI04lZ0F3WXiL
	BVyfDHlIqbDZcIgg+8Fda6CaKC9A726UHKw4CJLd1bv3RRq8fSX7Fc6PtD5cYMt69mdl
	vo69lLfPlHVXa9JJGD1WOLJPw+4xL1Lq2++/1D/loRdGrqQu2Yh8QnCF/hOTicAeCWeU
	4jOYQlNQE9VET+GWMyvYXWg3JcB/MFDlzGB2GbOSPcucY4VBwceD5HQHVO0UIqcQY452
	ze4Ag93NRPGzR2h6pg6izRC6fjbs5MDKgDexHENjzFI0RyMwPeQCWawD1DFMrKQlh/AB
	zho/B/rii+6TIGJfwElQ/BxVV8iDeaEZdqWaj2epQ0YsCPuoEHxswaAQHECBv3Df4GDM
	HGDRd+MWFsYKC+NnTD0js7wmFf4gcgOuAYS+ZdLHGZ9iJ049I844Kc6DE4jNdNPt94FC
	FDKKgyT7nexOvww/1mZcYdlloYnNVaCr0tXqpvBP0E/wqwyb0SZ2s3GTaZN5N9pt0lSh
	IcZK83kjU8b+gqWWszvRTryL3W1mk4OsxWg2gU1oVCoSHIKabGamRCAMwdtstBxQ/sQE
	e9rFOJWBPNVXLDCJ7+YR39qqY4U58J0JWGNArEIMqxHWGSGYZZqpM5stLMZkASxweKZZ
	fFrKBMgxCSjOIQeSOJejKTisJ4IrfUaQ3xe+MAFK0LTnrP/ZCaXbWrf5Q87MFE1OpoYd
	oBab34EgLJM5RVwj/uUNcXIHJ7ym4jwWYX0yMwzI9QzRtdLV1Qj/0/J9F7HfQZXCTq+B
	b7cMPV9tka+zksFeC8KXVyQCmwPuRB58fdUX/vunDJWjCum/aQZL/zEzDD0o/U/PSPg/
	nYfRKDQa1aI6NBZGxjAmll7LwfiodlDFwNKa1KrGGS2NzVMnjpfukLoh+RkAMdcvAVwD
	+BYeFwAsAEGAAoAqgFqAJoD5ACsANgPsBogCnAO4BHAN4FuYvABgAQgCFABUAdQCNAHM
	B1gBsBlgN0AU4BzAJYBrAN8CYQQAC0AQoACgCqAWoAlgflf3BbiinjJG7l51ePa+/lCv
	OlmBe5/P7FWHA+L7+nN61XN71eE7kPvuz+tV79urDvO67/4HetXhw6j7+st71cFgvK9/
	aK96da/6g73qw3vVR/aq1/SqP9Sr/nCvOuGqe+k5oVd9Yq/6pF51SU7uWc8pvfph7e8b
	f2qv+vRe9Rm96jN71YmXdS++s3rVZ/eqz+1Vf7xXvblXfV6vekuv+gJS/3+IsjAzCmVu
	ZHN0cmVhbQplbmRvYmoKMTkgMCBvYmoKMTA3MTMKZW5kb2JqCjIwIDAgb2JqCihNYWMg
	T1MgWCAxMC4xMC41IFF1YXJ0eiBQREZDb250ZXh0KQplbmRvYmoKMjEgMCBvYmoKKEQ6
	MjAxNzA0MDEwOTUwNTJaMDAnMDAnKQplbmRvYmoKMSAwIG9iago8PCAvUHJvZHVjZXIg
	MjAgMCBSIC9DcmVhdGlvbkRhdGUgMjEgMCBSIC9Nb2REYXRlIDIxIDAgUiA+PgplbmRv
	YmoKeHJlZgowIDIyCjAwMDAwMDAwMDAgNjU1MzUgZiAKMDAwMDAyNTY4MyAwMDAwMCBu
	IAowMDAwMDA4ODg0IDAwMDAwIG4gCjAwMDAwMTM5MjAgMDAwMDAgbiAKMDAwMDAwMDAy
	MiAwMDAwMCBuIAowMDAwMDA4ODY0IDAwMDAwIG4gCjAwMDAwMDg5OTQgMDAwMDAgbiAK
	MDAwMDAxMDQwNiAwMDAwMCBuIAowMDAwMDE0MDczIDAwMDAwIG4gCjAwMDAwMTM4ODQg
	MDAwMDAgbiAKMDAwMDAwOTE0MyAwMDAwMCBuIAowMDAwMDA5MTkwIDAwMDAwIG4gCjAw
	MDAwMDkyMzUgMDAwMDAgbiAKMDAwMDAxMDM4NSAwMDAwMCBuIAowMDAwMDEwNDQyIDAw
	MDAwIG4gCjAwMDAwMTM4NjMgMDAwMDAgbiAKMDAwMDAxNDAwOSAwMDAwMCBuIAowMDAw
	MDE0NTEyIDAwMDAwIG4gCjAwMDAwMTQ3NjIgMDAwMDAgbiAKMDAwMDAyNTU2NiAwMDAw
	MCBuIAowMDAwMDI1NTg4IDAwMDAwIG4gCjAwMDAwMjU2NDEgMDAwMDAgbiAKdHJhaWxl
	cgo8PCAvU2l6ZSAyMiAvUm9vdCAxNiAwIFIgL0luZm8gMSAwIFIgL0lEIFsgPDBkNjhk
	MGJjMDE5MDI3YTQ2NDIwNmU2YjU4MGMxZGViPgo8MGQ2OGQwYmMwMTkwMjdhNDY0MjA2
	ZTZiNTgwYzFkZWI+IF0gPj4Kc3RhcnR4cmVmCjI1NzU4CiUlRU9GCg==
	</data>
	<key>ArchiveMatchStore</key>
	<dict>
		<key>Archive_Stores</key>
		<array>
			<dict>
				<key>Class_Store</key>
				<string>DKDLock</string>
				<key>Match_Hashes</key>
				<array>
					<dict>
						<key>BinIndex</key>
						<string>14</string>
						<key>BinMatches</key>
						<array>
							<dict/>
						</array>
					</dict>
				</array>
				<key>NHashBins</key>
				<string>16</string>
			</dict>
			<dict>
				<key>Class_Store</key>
				<string>DKDGraphicStyle</string>
				<key>Match_Hashes</key>
				<array>
					<dict>
						<key>BinIndex</key>
						<string>8</string>
						<key>BinMatches</key>
						<array>
							<dict>
								<key>DrawsFill</key>
								<string>NO</string>
								<key>DrawsLine</key>
								<string>YES</string>
								<key>LineCapStyle</key>
								<string>Square</string>
								<key>LineJoinStyle</key>
								<string>Miter</string>
								<key>LineRGB</key>
								<string>rgb 0 0 0 1</string>
								<key>LineWidth</key>
								<string>3.877907037735</string>
								<key>MiterLimit</key>
								<string>10</string>
								<key>StrokePosition</key>
								<string>Front</string>
								<key>WindingRule</key>
								<string>Non-Zero</string>
							</dict>
							<dict>
								<key>DrawsFill</key>
								<string>NO</string>
								<key>DrawsLine</key>
								<string>YES</string>
								<key>LineCapStyle</key>
								<string>Square</string>
								<key>LineJoinStyle</key>
								<string>Miter</string>
								<key>LineRGB</key>
								<string>rgb 0 0 0 1</string>
								<key>LineWidth</key>
								<string>3.601358175278</string>
								<key>MiterLimit</key>
								<string>10</string>
								<key>StrokePosition</key>
								<string>Front</string>
								<key>WindingRule</key>
								<string>Non-Zero</string>
							</dict>
							<dict>
								<key>DrawsFill</key>
								<string>NO</string>
								<key>DrawsLine</key>
								<string>YES</string>
								<key>LineCapStyle</key>
								<string>Square</string>
								<key>LineJoinStyle</key>
								<string>Miter</string>
								<key>LineRGB</key>
								<string>rgb 0.14118 0 1 1</string>
								<key>LineWidth</key>
								<string>1</string>
								<key>MiterLimit</key>
								<string>10</string>
								<key>StrokePosition</key>
								<string>Front</string>
								<key>WindingRule</key>
								<string>Non-Zero</string>
							</dict>
							<dict>
								<key>DrawsFill</key>
								<string>NO</string>
								<key>DrawsLine</key>
								<string>YES</string>
								<key>LineCapStyle</key>
								<string>Square</string>
								<key>LineJoinStyle</key>
								<string>Miter</string>
								<key>LineRGB</key>
								<string>rgb 0 0 0 1</string>
								<key>LineWidth</key>
								<string>1</string>
								<key>MiterLimit</key>
								<string>10</string>
								<key>StrokePosition</key>
								<string>Front</string>
								<key>WindingRule</key>
								<string>Non-Zero</string>
							</dict>
							<dict>
								<key>DrawsFill</key>
								<string>NO</string>
								<key>DrawsLine</key>
								<string>YES</string>
								<key>LineCapStyle</key>
								<string>Square</string>
								<key>LineJoinStyle</key>
								<string>Miter</string>
								<key>LineRGB</key>
								<string>rgb 0 0 0 1</string>
								<key>LineWidth</key>
								<string>3.630586862564</string>
								<key>MiterLimit</key>
								<string>10</string>
								<key>StrokePosition</key>
								<string>Front</string>
								<key>WindingRule</key>
								<string>Non-Zero</string>
							</dict>
							<dict>
								<key>DrawsFill</key>
								<string>NO</string>
								<key>DrawsLine</key>
								<string>YES</string>
								<key>LineCapStyle</key>
								<string>Square</string>
								<key>LineJoinStyle</key>
								<string>Miter</string>
								<key>LineRGB</key>
								<string>rgb 0 0.50196 0.12992 1</string>
								<key>LineWidth</key>
								<string>10</string>
								<key>MiterLimit</key>
								<string>10</string>
								<key>StrokePosition</key>
								<string>Front</string>
								<key>WindingRule</key>
								<string>Non-Zero</string>
							</dict>
						</array>
					</dict>
					<dict>
						<key>BinIndex</key>
						<string>9</string>
						<key>BinMatches</key>
						<array>
							<dict>
								<key>DrawsFill</key>
								<string>YES</string>
								<key>DrawsLine</key>
								<string>YES</string>
								<key>FillRGB</key>
								<string>rgb 0.37647 0.37647 0.37647 1</string>
								<key>LineCapStyle</key>
								<string>Square</string>
								<key>LineJoinStyle</key>
								<string>Miter</string>
								<key>LineRGB</key>
								<string>rgb 0 0 0 1</string>
								<key>LineWidth</key>
								<string>1</string>
								<key>MiterLimit</key>
								<string>10</string>
								<key>StrokePosition</key>
								<string>Front</string>
								<key>WindingRule</key>
								<string>Non-Zero</string>
							</dict>
							<dict>
								<key>DrawsFill</key>
								<string>YES</string>
								<key>DrawsLine</key>
								<string>YES</string>
								<key>FillRGB</key>
								<string>rgb 0.75294 0.75294 0.75294 1</string>
								<key>LineCapStyle</key>
								<string>Square</string>
								<key>LineJoinStyle</key>
								<string>Miter</string>
								<key>LineRGB</key>
								<string>rgb 0.6902 0.6902 0.6902 1</string>
								<key>LineWidth</key>
								<string>1</string>
								<key>MiterLimit</key>
								<string>10</string>
								<key>StrokePosition</key>
								<string>Front</string>
								<key>WindingRule</key>
								<string>Non-Zero</string>
							</dict>
							<dict>
								<key>DrawsFill</key>
								<string>YES</string>
								<key>DrawsLine</key>
								<string>YES</string>
								<key>FillRGB</key>
								<string>rgb 1 0 0.72941 1</string>
								<key>LineCapStyle</key>
								<string>Square</string>
								<key>LineJoinStyle</key>
								<string>Miter</string>
								<key>LineRGB</key>
								<string>rgb 0 0 0 1</string>
								<key>LineWidth</key>
								<string>1</string>
								<key>MiterLimit</key>
								<string>10</string>
								<key>StrokePosition</key>
								<string>Front</string>
								<key>WindingRule</key>
								<string>Non-Zero</string>
							</dict>
							<dict>
								<key>DrawsFill</key>
								<string>YES</string>
								<key>DrawsLine</key>
								<string>YES</string>
								<key>FillRGB</key>
								<string>rgb 0.08858 0.75294 0 1</string>
								<key>LineCapStyle</key>
								<string>Square</string>
								<key>LineJoinStyle</key>
								<string>Miter</string>
								<key>LineRGB</key>
								<string>rgb 0 0 0 1</string>
								<key>LineWidth</key>
								<string>1</string>
								<key>MiterLimit</key>
								<string>10</string>
								<key>StrokePosition</key>
								<string>Front</string>
								<key>WindingRule</key>
								<string>Non-Zero</string>
							</dict>
							<dict>
								<key>DrawsFill</key>
								<string>YES</string>
								<key>DrawsLine</key>
								<string>YES</string>
								<key>FillRGB</key>
								<string>rgb 0.05905 0.50196 0 1</string>
								<key>LineCapStyle</key>
								<string>Square</string>
								<key>LineJoinStyle</key>
								<string>Miter</string>
								<key>LineRGB</key>
								<string>rgb 0 0 0 1</string>
								<key>LineWidth</key>
								<string>1</string>
								<key>MiterLimit</key>
								<string>10</string>
								<key>StrokePosition</key>
								<string>Front</string>
								<key>WindingRule</key>
								<string>Non-Zero</string>
							</dict>
							<dict>
								<key>DrawsFill</key>
								<string>YES</string>
								<key>DrawsLine</key>
								<string>YES</string>
								<key>FillRGB</key>
								<string>rgb 0.50196 0.50196 0.50196 1</string>
								<key>LineCapStyle</key>
								<string>Square</string>
								<key>LineJoinStyle</key>
								<string>Miter</string>
								<key>LineRGB</key>
								<string>rgb 0.50196 0.50196 0.50196 1</string>
								<key>LineWidth</key>
								<string>1</string>
								<key>MiterLimit</key>
								<string>10</string>
								<key>StrokePosition</key>
								<string>Front</string>
								<key>WindingRule</key>
								<string>Non-Zero</string>
							</dict>
							<dict>
								<key>DrawsFill</key>
								<string>YES</string>
								<key>DrawsLine</key>
								<string>YES</string>
								<key>FillRGB</key>
								<string>rgb 0.50196 0.18897 0 1</string>
								<key>LineCapStyle</key>
								<string>Square</string>
								<key>LineJoinStyle</key>
								<string>Miter</string>
								<key>LineRGB</key>
								<string>rgb 0 0 0 1</string>
								<key>LineWidth</key>
								<string>1</string>
								<key>MiterLimit</key>
								<string>10</string>
								<key>StrokePosition</key>
								<string>Front</string>
								<key>WindingRule</key>
								<string>Non-Zero</string>
							</dict>
							<dict>
								<key>DrawsFill</key>
								<string>YES</string>
								<key>DrawsLine</key>
								<string>YES</string>
								<key>FillRGB</key>
								<string>rgb 0 0.50196 0.12992 1</string>
								<key>LineCapStyle</key>
								<string>Square</string>
								<key>LineJoinStyle</key>
								<string>Miter</string>
								<key>LineRGB</key>
								<string>rgb 0 0 0 1</string>
								<key>LineWidth</key>
								<string>1</string>
								<key>MiterLimit</key>
								<string>10</string>
								<key>StrokePosition</key>
								<string>Front</string>
								<key>WindingRule</key>
								<string>Non-Zero</string>
							</dict>
							<dict>
								<key>DrawsFill</key>
								<string>YES</string>
								<key>DrawsLine</key>
								<string>YES</string>
								<key>FillRGB</key>
								<string>rgb 1 0.37647 0 1</string>
								<key>LineCapStyle</key>
								<string>Square</string>
								<key>LineJoinStyle</key>
								<string>Miter</string>
								<key>LineRGB</key>
								<string>rgb 0 0 0 1</string>
								<key>LineWidth</key>
								<string>1</string>
								<key>MiterLimit</key>
								<string>10</string>
								<key>StrokePosition</key>
								<string>Front</string>
								<key>WindingRule</key>
								<string>Non-Zero</string>
							</dict>
							<dict>
								<key>DrawsFill</key>
								<string>YES</string>
								<key>DrawsLine</key>
								<string>YES</string>
								<key>FillRGB</key>
								<string>rgb 0.62745 0.62745 0.62745 1</string>
								<key>LineCapStyle</key>
								<string>Square</string>
								<key>LineJoinStyle</key>
								<string>Miter</string>
								<key>LineRGB</key>
								<string>rgb 0.6902 0.6902 0.6902 1</string>
								<key>LineWidth</key>
								<string>1</string>
								<key>MiterLimit</key>
								<string>10</string>
								<key>StrokePosition</key>
								<string>Front</string>
								<key>WindingRule</key>
								<string>Non-Zero</string>
							</dict>
							<dict>
								<key>DrawsFill</key>
								<string>YES</string>
								<key>DrawsLine</key>
								<string>YES</string>
								<key>FillRGB</key>
								<string>rgb 0 0 0 1</string>
								<key>LineCapStyle</key>
								<string>Square</string>
								<key>LineJoinStyle</key>
								<string>Miter</string>
								<key>LineRGB</key>
								<string>rgb 0 0 0 1</string>
								<key>LineWidth</key>
								<string>1</string>
								<key>MiterLimit</key>
								<string>10</string>
								<key>StrokePosition</key>
								<string>Front</string>
								<key>WindingRule</key>
								<string>Non-Zero</string>
							</dict>
						</array>
					</dict>
					<dict>
						<key>BinIndex</key>
						<string>10</string>
						<key>BinMatches</key>
						<array>
							<dict>
								<key>DrawsFill</key>
								<string>NO</string>
								<key>DrawsLine</key>
								<string>NO</string>
								<key>LineCapStyle</key>
								<string>Square</string>
								<key>LineJoinStyle</key>
								<string>Miter</string>
								<key>LineWidth</key>
								<string>1</string>
								<key>MiterLimit</key>
								<string>10</string>
								<key>StrokePosition</key>
								<string>Front</string>
								<key>WindingRule</key>
								<string>Non-Zero</string>
							</dict>
						</array>
					</dict>
				</array>
				<key>NHashBins</key>
				<string>16</string>
			</dict>
			<dict>
				<key>Class_Store</key>
				<string>DKDParagraph</string>
				<key>Match_Hashes</key>
				<array>
					<dict>
						<key>BinIndex</key>
						<string>0</string>
						<key>BinMatches</key>
						<array>
							<dict>
								<key>FirstLineHeadIndent</key>
								<string>0</string>
								<key>HeadIndent</key>
								<string>0</string>
								<key>LineFragmentPadding</key>
								<string>5</string>
								<key>LineSpacing</key>
								<string>0</string>
								<key>ParagraphSpacing</key>
								<string>0</string>
								<key>ParagraphSpacingBefore</key>
								<string>0</string>
								<key>TailIndent</key>
								<string>0</string>
								<key>TextAlignment</key>
								<string>Left</string>
							</dict>
						</array>
					</dict>
				</array>
				<key>NHashBins</key>
				<string>16</string>
			</dict>
			<dict>
				<key>Class_Store</key>
				<string>DKDFont</string>
				<key>Match_Hashes</key>
				<array>
					<dict>
						<key>BinIndex</key>
						<string>0</string>
						<key>BinMatches</key>
						<array>
							<dict>
								<key>Name</key>
								<string>Helvetica</string>
								<key>Size</key>
								<string>14</string>
							</dict>
							<dict>
								<key>Name</key>
								<string>Helvetica</string>
								<key>Size</key>
								<string>9</string>
							</dict>
							<dict>
								<key>Name</key>
								<string>Helvetica</string>
								<key>Size</key>
								<string>10</string>
							</dict>
							<dict>
								<key>Name</key>
								<string>Helvetica</string>
								<key>Size</key>
								<string>11</string>
							</dict>
							<dict>
								<key>Name</key>
								<string>Helvetica</string>
								<key>Size</key>
								<string>12</string>
							</dict>
						</array>
					</dict>
				</array>
				<key>NHashBins</key>
				<string>16</string>
			</dict>
			<dict>
				<key>Class_Store</key>
				<string>DKDTextAttributes</string>
				<key>Match_Hashes</key>
				<array>
					<dict>
						<key>BinIndex</key>
						<string>0</string>
						<key>BinMatches</key>
						<array>
							<dict>
								<key>Font</key>
								<string>0</string>
								<key>ForeColor</key>
								<string>rgb 1 0 0.35294 1</string>
								<key>Paragraph</key>
								<string>0</string>
							</dict>
							<dict>
								<key>Font</key>
								<string>0</string>
								<key>ForeColor</key>
								<string>white 0 1</string>
							</dict>
							<dict>
								<key>Font</key>
								<string>0</string>
								<key>ForeColor</key>
								<string>rgb 0.14118 0 1 1</string>
								<key>Paragraph</key>
								<string>0</string>
							</dict>
							<dict>
								<key>Font</key>
								<string>0</string>
								<key>ForeColor</key>
								<string>white 0 1</string>
								<key>Paragraph</key>
								<string>0</string>
							</dict>
							<dict>
								<key>Font</key>
								<string>16</string>
								<key>ForeColor</key>
								<string>rgb 0.14118 0 1 1</string>
								<key>Paragraph</key>
								<string>0</string>
							</dict>
							<dict>
								<key>Font</key>
								<string>16</string>
								<key>ForeColor</key>
								<string>rgb 0 0 0 1</string>
								<key>Paragraph</key>
								<string>0</string>
							</dict>
							<dict>
								<key>Font</key>
								<string>0</string>
								<key>ForeColor</key>
								<string>rgb 0 0.50196 0.12992 1</string>
								<key>Paragraph</key>
								<string>0</string>
							</dict>
							<dict>
								<key>Font</key>
								<string>32</string>
								<key>ForeColor</key>
								<string>rgb 0 0.50196 0.12992 1</string>
								<key>Paragraph</key>
								<string>0</string>
							</dict>
							<dict>
								<key>Font</key>
								<string>0</string>
								<key>ForeColor</key>
								<string>rgb 1 0.37647 0 1</string>
								<key>Paragraph</key>
								<string>0</string>
							</dict>
							<dict>
								<key>Font</key>
								<string>48</string>
								<key>ForeColor</key>
								<string>rgb 0.50196 0.18897 0 1</string>
								<key>Paragraph</key>
								<string>0</string>
							</dict>
							<dict>
								<key>Font</key>
								<string>64</string>
								<key>ForeColor</key>
								<string>white 0 1</string>
								<key>Paragraph</key>
								<string>0</string>
							</dict>
							<dict>
								<key>Font</key>
								<string>48</string>
								<key>ForeColor</key>
								<string>rgb 1 0.37647 0 1</string>
								<key>Paragraph</key>
								<string>0</string>
							</dict>
							<dict>
								<key>Font</key>
								<string>0</string>
								<key>ForeColor</key>
								<string>rgb 1 0 0.72941 1</string>
								<key>Paragraph</key>
								<string>0</string>
							</dict>
							<dict>
								<key>Font</key>
								<string>48</string>
								<key>ForeColor</key>
								<string>rgb 0.50196 0.18824 0 1</string>
								<key>Paragraph</key>
								<string>0</string>
							</dict>
							<dict>
								<key>Font</key>
								<string>48</string>
								<key>ForeColor</key>
								<string>white 0 1</string>
								<key>Paragraph</key>
								<string>0</string>
							</dict>
							<dict>
								<key>Font</key>
								<string>16</string>
								<key>ForeColor</key>
								<string>white 0 1</string>
								<key>Paragraph</key>
								<string>0</string>
							</dict>
						</array>
					</dict>
				</array>
				<key>NHashBins</key>
				<string>16</string>
			</dict>
		</array>
	</dict>
	<key>DKDChangeTimeStamp</key>
	<string>2017-04-01 09:50:27 +0000</string>
	<key>DKDCreateTimeStamp</key>
	<string>2017-03-04 11:00:14 +0000</string>
	<key>DKDDisplayGraphicDetails</key>
	<dict>
		<key>AngleFormatDisplayDetails</key>
		<dict>
			<key>AngleDirection</key>
			<string>Right</string>
			<key>AngleForm</key>
			<string>degrees</string>
			<key>AngleRotation</key>
			<string>Counter Clockwise</string>
			<key>PrecisionAngles</key>
			<string>2</string>
		</dict>
		<key>AnglesDisplaySpec</key>
		<dict>
			<key>ExampleValueDisplaySpec</key>
			<string>100.01</string>
			<key>FieldWidthDisplaySpec</key>
			<string>62</string>
			<key>FormDisplaySpec</key>
			<string>Decimal</string>
			<key>PrecisionDisplaySpec</key>
			<string>2</string>
			<key>TextAlignDisplaySpec</key>
			<string>Right</string>
			<key>UnitsDisplaySpec</key>
			<string>Punctuation</string>
		</dict>
		<key>AreaForm</key>
		<string>Natural</string>
		<key>HelpTipDisplaySpec</key>
		<dict>
			<key>ExampleValueDisplaySpec</key>
			<string>100.01</string>
			<key>FieldWidthDisplaySpec</key>
			<string>62</string>
			<key>FormDisplaySpec</key>
			<string>Decimal</string>
			<key>PrecisionDisplaySpec</key>
			<string>3</string>
			<key>TextAlignDisplaySpec</key>
			<string>Right</string>
			<key>UnitsDisplaySpec</key>
			<string>Abbreviate</string>
		</dict>
		<key>InspectingSpecIndex</key>
		<string>0</string>
		<key>LengthsDisplaySpec</key>
		<dict>
			<key>ExampleValueDisplaySpec</key>
			<string>100.01</string>
			<key>FieldWidthDisplaySpec</key>
			<string>62</string>
			<key>FormDisplaySpec</key>
			<string>Decimal</string>
			<key>PrecisionDisplaySpec</key>
			<string>2</string>
			<key>TextAlignDisplaySpec</key>
			<string>Right</string>
			<key>UnitsDisplaySpec</key>
			<string>Nothing</string>
		</dict>
		<key>PercentDisplaySpec</key>
		<dict>
			<key>ExampleValueDisplaySpec</key>
			<string>1.01</string>
			<key>FieldWidthDisplaySpec</key>
			<string>50</string>
			<key>FormDisplaySpec</key>
			<string>Decimal</string>
			<key>PrecisionDisplaySpec</key>
			<string>1</string>
			<key>TextAlignDisplaySpec</key>
			<string>Right</string>
			<key>UnitsDisplaySpec</key>
			<string>Punctuation</string>
		</dict>
		<key>PercentFormatDisplayDetails</key>
		<dict>
			<key>PercentForm</key>
			<string>Percent</string>
			<key>PrecisionPercents</key>
			<string>1</string>
		</dict>
	</dict>
	<key>DKDGrids</key>
	<dict>
		<key>DynamicSnapGrid</key>
		<string>YES</string>
		<key>GuidesLayer</key>
		<string>NO</string>
		<key>MajorGrid</key>
		<dict>
			<key>GridAboveGraphics</key>
			<string>NO</string>
			<key>GridRGB</key>
			<dict>
				<key>Blue</key>
				<string>1</string>
				<key>ColorSpace</key>
				<string>NSCalibratedRGBColorSpace</string>
				<key>Green</key>
				<string>0.956863</string>
				<key>Opacity</key>
				<string>1</string>
				<key>Red</key>
				<string>0.572549</string>
			</dict>
			<key>GridSpacingX</key>
			<string>72</string>
			<key>GridSpacingY</key>
			<string>72</string>
			<key>LinkGridToRulers</key>
			<string>NO</string>
			<key>PrintLineWidth</key>
			<string>1.1</string>
			<key>PrintsGrid</key>
			<string>NO</string>
			<key>ShowsGrid</key>
			<string>NO</string>
			<key>SnapsToGrid</key>
			<string>NO</string>
		</dict>
		<key>MinorGrid</key>
		<dict>
			<key>GridAboveGraphics</key>
			<string>NO</string>
			<key>GridRGB</key>
			<dict>
				<key>Blue</key>
				<string>0.858824</string>
				<key>ColorSpace</key>
				<string>NSCalibratedRGBColorSpace</string>
				<key>Green</key>
				<string>0.878431</string>
				<key>Opacity</key>
				<string>1</string>
				<key>Red</key>
				<string>0.803922</string>
			</dict>
			<key>GridSpacingX</key>
			<string>18</string>
			<key>GridSpacingY</key>
			<string>18</string>
			<key>LinkGridToRulers</key>
			<string>NO</string>
			<key>PrintLineWidth</key>
			<string>0.85</string>
			<key>PrintsGrid</key>
			<string>NO</string>
			<key>ShowsGrid</key>
			<string>NO</string>
			<key>SnapsToGrid</key>
			<string>NO</string>
		</dict>
		<key>SnapDrawing</key>
		<string>NO</string>
		<key>SnapEnds</key>
		<string>NO</string>
		<key>SnapGuidelines</key>
		<string>NO</string>
		<key>SnapRadiusGrid</key>
		<string>3</string>
		<key>SnapSound</key>
		<string>None</string>
		<key>SoftSnap</key>
		<string>NO</string>
	</dict>
	<key>DKDHideExtension</key>
	<string>YES</string>
	<key>DKDLayersList</key>
	<array>
		<dict>
			<key>CloakLayerGuidelines</key>
			<string>NO</string>
			<key>CloakLayerVertices</key>
			<string>NO</string>
			<key>FullLayerScale</key>
			<dict>
				<key>ArchivePrecision</key>
				<string>12</string>
				<key>ScaleOriginX</key>
				<string>0</string>
				<key>ScaleOriginY</key>
				<string>0</string>
				<key>ScalePlusDown</key>
				<string>YES</string>
				<key>ScalePlusToRight</key>
				<string>YES</string>
				<key>ScaleScale</key>
				<string>1</string>
				<key>ScaleUnits</key>
				<string>Centimeters</string>
			</dict>
			<key>HideDimensions</key>
			<string>NO</string>
			<key>LayerColorMod</key>
			<dict>
				<key>DKDOnColorMod</key>
				<string>NO</string>
				<key>DKDOpacityColorMod</key>
				<string>0.5</string>
				<key>DKDOutlineColorMod</key>
				<string>NO</string>
				<key>DKDTintColorColorMod</key>
				<dict>
					<key>ColorSpace</key>
					<string>NSCalibratedWhiteColorSpace</string>
					<key>Opacity</key>
					<string>1</string>
					<key>White</key>
					<string>0.5</string>
				</dict>
				<key>DKDTintFractionColorMod</key>
				<string>0.5</string>
			</dict>
			<key>LayerLock</key>
			<string>NO</string>
			<key>LayerName</key>
			<string>Layer--1</string>
			<key>LayerState</key>
			<string>On</string>
			<key>OutlineLayer</key>
			<string>NO</string>
		</dict>
		<dict>
			<key>CloakLayerGuidelines</key>
			<string>NO</string>
			<key>CloakLayerVertices</key>
			<string>NO</string>
			<key>FullLayerScale</key>
			<dict>
				<key>ArchivePrecision</key>
				<string>12</string>
				<key>ScaleOriginX</key>
				<string>0</string>
				<key>ScaleOriginY</key>
				<string>0</string>
				<key>ScalePlusDown</key>
				<string>YES</string>
				<key>ScalePlusToRight</key>
				<string>YES</string>
				<key>ScaleScale</key>
				<string>1</string>
				<key>ScaleUnits</key>
				<string>Centimeters</string>
			</dict>
			<key>GraphicsList</key>
			<array>
				<dict>
					<key>Bounds</key>
					<string>{{146.554619418, 64.2041282462}, {25.5099518715, 15.9079851779}}</string>
					<key>Class</key>
					<string>DKDRadiusRectangle</string>
					<key>DKDLockInfo</key>
					<string>14</string>
					<key>DKDRectRadius0</key>
					<string>7.95399258894</string>
					<key>DKDRectRadius1</key>
					<string>7.95399258894</string>
					<key>DKDRectRadius2</key>
					<string>7.95399258894</string>
					<key>DKDRectRadius3</key>
					<string>7.95399258894</string>
					<key>GraphicID</key>
					<string>F68261CB</string>
					<key>GraphicStyle</key>
					<string>9</string>
				</dict>
				<dict>
					<key>Bounds</key>
					<string>{{12.9924261743, 157.501043465}, {160.630157766, 21.8837321266}}</string>
					<key>Class</key>
					<string>DKDRectangle</string>
					<key>DKDLockInfo</key>
					<string>14</string>
					<key>GraphicID</key>
					<string>07A22DAB</string>
					<key>GraphicStyle</key>
					<string>25</string>
				</dict>
				<dict>
					<key>Bounds</key>
					<string>{{83.9001348364, 148.481688808}, {12.0091622502, 38.3775748485}}</string>
					<key>Class</key>
					<string>DKDRadiusRectangle</string>
					<key>DKDLockInfo</key>
					<string>14</string>
					<key>DKDRectRadius0</key>
					<string>6.004581125109</string>
					<key>DKDRectRadius1</key>
					<string>6.004581125109</string>
					<key>DKDRectRadius2</key>
					<string>6.004581125109</string>
					<key>DKDRectRadius3</key>
					<string>6.004581125109</string>
					<key>GraphicID</key>
					<string>B88AD79B</string>
					<key>GraphicStyle</key>
					<string>41</string>
				</dict>
				<dict>
					<key>Bounds</key>
					<string>{{97.1196258158, 145.308293778}, {19.1392972751, 14.5976171378}}</string>
					<key>Class</key>
					<string>DKDBowTie</string>
					<key>DKDLockInfo</key>
					<string>14</string>
					<key>DownBowtieChartFraction</key>
					<string>0.5</string>
					<key>GraphicID</key>
					<string>7EF71C9B</string>
					<key>GraphicStyle</key>
					<string>57</string>
					<key>OverBowtieChartFraction</key>
					<string>0</string>
				</dict>
				<dict>
					<key>Bounds</key>
					<string>{{97.741274561, 142.962372933}, {17.2942869797, 4.391978721465}}</string>
					<key>Class</key>
					<string>DKDTriangleDown</string>
					<key>DKDLockInfo</key>
					<string>14</string>
					<key>GraphicID</key>
					<string>AACF1F9B</string>
					<key>GraphicStyle</key>
					<string>73</string>
					<key>TriangleTipFraction</key>
					<string>0.5</string>
				</dict>
				<dict>
					<key>Bounds</key>
					<string>{{113.875452751, 64.2041282462}, {25.5099518715, 15.9079851779}}</string>
					<key>Class</key>
					<string>DKDRadiusRectangle</string>
					<key>DKDLockInfo</key>
					<string>14</string>
					<key>DKDRectRadius0</key>
					<string>7.95399258894</string>
					<key>DKDRectRadius1</key>
					<string>7.95399258894</string>
					<key>DKDRectRadius2</key>
					<string>7.95399258894</string>
					<key>DKDRectRadius3</key>
					<string>7.95399258894</string>
					<key>GraphicID</key>
					<string>525977AB</string>
					<key>GraphicStyle</key>
					<string>9</string>
				</dict>
				<dict>
					<key>Bounds</key>
					<string>{{116.64988967, 51.6801330637}, {20.4239711104, 12.3420655935}}</string>
					<key>Class</key>
					<string>DKDRadiusRectangle</string>
					<key>DKDLockInfo</key>
					<string>14</string>
					<key>DKDRectRadius0</key>
					<string>6.171032796732</string>
					<key>DKDRectRadius1</key>
					<string>6.171032796732</string>
					<key>DKDRectRadius2</key>
					<string>6.171032796732</string>
					<key>DKDRectRadius3</key>
					<string>6.171032796732</string>
					<key>GraphicID</key>
					<string>625977AB</string>
					<key>GraphicStyle</key>
					<string>9</string>
				</dict>
				<dict>
					<key>Bounds</key>
					<string>{{11.1989952154, 80.9939914846}, {160.630157766, 21.8837321266}}</string>
					<key>Class</key>
					<string>DKDRectangle</string>
					<key>DKDLockInfo</key>
					<string>14</string>
					<key>GraphicID</key>
					<string>C7485BAB</string>
					<key>GraphicStyle</key>
					<string>89</string>
				</dict>
				<dict>
					<key>Bounds</key>
					<string>{{25.8046194177, 64.2041282462}, {25.5099518715, 15.9079851779}}</string>
					<key>Class</key>
					<string>DKDRadiusRectangle</string>
					<key>DKDLockInfo</key>
					<string>14</string>
					<key>DKDRectRadius0</key>
					<string>7.95399258894</string>
					<key>DKDRectRadius1</key>
					<string>7.95399258894</string>
					<key>DKDRectRadius2</key>
					<string>7.95399258894</string>
					<key>DKDRectRadius3</key>
					<string>7.95399258894</string>
					<key>GraphicID</key>
					<string>916804BB</string>
					<key>GraphicStyle</key>
					<string>9</string>
				</dict>
				<dict>
					<key>Bounds</key>
					<string>{{28.7945168247, 51.6420464166}, {20.4239711104, 12.3420655935}}</string>
					<key>Class</key>
					<string>DKDRadiusRectangle</string>
					<key>DKDLockInfo</key>
					<string>14</string>
					<key>DKDRectRadius0</key>
					<string>6.171032796732</string>
					<key>DKDRectRadius1</key>
					<string>6.171032796732</string>
					<key>DKDRectRadius2</key>
					<string>6.171032796732</string>
					<key>DKDRectRadius3</key>
					<string>6.171032796732</string>
					<key>GraphicID</key>
					<string>A16804BB</string>
					<key>GraphicStyle</key>
					<string>9</string>
				</dict>
				<dict>
					<key>Class</key>
					<string>DKDBezier</string>
					<key>DKDLockInfo</key>
					<string>14</string>
					<key>GraphicID</key>
					<string>D64681BB</string>
					<key>GraphicStyle</key>
					<string>8</string>
					<key>SVGPath</key>
					<string>M35.8758914828,70.4767096838 C39.1841394142,108.29015657 28.1252388848,117.058405397 77.1338359913,116.01346372</string>
				</dict>
				<dict>
					<key>Class</key>
					<string>DKDBezier</string>
					<key>DKDLockInfo</key>
					<string>14</string>
					<key>GraphicID</key>
					<string>FDAD16BB</string>
					<key>GraphicStyle</key>
					<string>24</string>
					<key>SVGPath</key>
					<string>M126.507598105,70.457181099 C128.346615164,83.7551461771 128.538194489,99.6458720673 129.073040992,103.853013965</string>
				</dict>
				<dict>
					<key>Bounds</key>
					<string>{{100.385798443, 113.638787808}, {11.1774433234, 3.761205432433}}</string>
					<key>Class</key>
					<string>DKDRoundedRectangle</string>
					<key>DKDLockInfo</key>
					<string>14</string>
					<key>DKDRectRadius0</key>
					<string>10</string>
					<key>DKDRectRadius1</key>
					<string>10</string>
					<key>DKDRectRadius2</key>
					<string>10</string>
					<key>DKDRectRadius3</key>
					<string>10</string>
					<key>GraphicID</key>
					<string>874097BB</string>
					<key>GraphicStyle</key>
					<string>105</string>
				</dict>
				<dict>
					<key>AttributedText</key>
					<dict>
						<key>String</key>
						<string>PPM</string>
						<key>TextAttribute</key>
						<string>0</string>
					</dict>
					<key>Bounds</key>
					<string>{{10.3882202528, 159.642280841}, {41.9340967083, 19.6875002003}}</string>
					<key>Class</key>
					<string>DKDTextArea</string>
					<key>DKDLockInfo</key>
					<string>14</string>
					<key>GraphicID</key>
					<string>3810EABB</string>
					<key>GraphicStyle</key>
					<string>10</string>
				</dict>
				<dict>
					<key>Bounds</key>
					<string>{{78.4078864656, 115.235842456}, {17.2942869797, 4.391978721465}}</string>
					<key>Class</key>
					<string>DKDTriangleDown</string>
					<key>DKDLockInfo</key>
					<string>14</string>
					<key>GraphicID</key>
					<string>852F6EBB</string>
					<key>GraphicStyle</key>
					<string>73</string>
					<key>TriangleTipFraction</key>
					<string>0.5</string>
				</dict>
				<dict>
					<key>Bounds</key>
					<string>{{122.358088549, 80.6385226026}, {4.391978721465, 17.2942869797}}</string>
					<key>Class</key>
					<string>DKDTriangleLeft</string>
					<key>DKDLockInfo</key>
					<string>14</string>
					<key>GraphicID</key>
					<string>F8D900CB</string>
					<key>GraphicStyle</key>
					<string>121</string>
					<key>TriangleTipFraction</key>
					<string>0.5</string>
				</dict>
				<dict>
					<key>Bounds</key>
					<string>{{149.544516825, 51.6420464166}, {20.4239711104, 12.3420655935}}</string>
					<key>Class</key>
					<string>DKDRadiusRectangle</string>
					<key>DKDLockInfo</key>
					<string>14</string>
					<key>DKDRectRadius0</key>
					<string>6.171032796732</string>
					<key>DKDRectRadius1</key>
					<string>6.171032796732</string>
					<key>DKDRectRadius2</key>
					<string>6.171032796732</string>
					<key>DKDRectRadius3</key>
					<string>6.171032796732</string>
					<key>GraphicID</key>
					<string>178261CB</string>
					<key>GraphicStyle</key>
					<string>9</string>
				</dict>
				<dict>
					<key>Bounds</key>
					<string>{{152.71941292, 72.4389488676}, {12.8604050956, 8.297695681471}}</string>
					<key>Class</key>
					<string>DKDRadiusRectangle</string>
					<key>DKDLockInfo</key>
					<string>14</string>
					<key>DKDRectRadius0</key>
					<string>4.148847840735</string>
					<key>DKDRectRadius1</key>
					<string>4.148847840735</string>
					<key>DKDRectRadius2</key>
					<string>4.148847840735</string>
					<key>DKDRectRadius3</key>
					<string>4.148847840735</string>
					<key>GraphicID</key>
					<string>D7DD8AAB</string>
					<key>GraphicStyle</key>
					<string>137</string>
				</dict>
				<dict>
					<key>AttributedText</key>
					<dict>
						<key>String</key>
						<string>ER</string>
						<key>TextAttribute</key>
						<string>16</string>
					</dict>
					<key>Bounds</key>
					<string>{{63.8568736722, 82.4485072697}, {40.0422290087, 16}}</string>
					<key>Class</key>
					<string>DKDTextArea</string>
					<key>DKDLockInfo</key>
					<string>14</string>
					<key>GraphicID</key>
					<string>8E9FC9BB</string>
					<key>GraphicStyle</key>
					<string>10</string>
				</dict>
				<dict>
					<key>Bounds</key>
					<string>{{10.7858472712, 243.724307845}, {160.630157766, 21.8837321266}}</string>
					<key>Class</key>
					<string>DKDRectangle</string>
					<key>DKDLockInfo</key>
					<string>14</string>
					<key>GraphicID</key>
					<string>3A8564CB</string>
					<key>GraphicStyle</key>
					<string>153</string>
				</dict>
				<dict>
					<key>Bounds</key>
					<string>{{11.1285099932, 270.645118764}, {160.630157766, 21.8837321266}}</string>
					<key>Class</key>
					<string>DKDRectangle</string>
					<key>DKDLockInfo</key>
					<string>14</string>
					<key>GraphicID</key>
					<string>2FBEA4CB</string>
					<key>GraphicStyle</key>
					<string>153</string>
				</dict>
				<dict>
					<key>AttributedText</key>
					<dict>
						<key>String</key>
						<string>OM</string>
						<key>TextAttribute</key>
						<string>32</string>
					</dict>
					<key>Bounds</key>
					<string>{{20.4468394944, 246.317300662}, {40.0422290087, 17}}</string>
					<key>Class</key>
					<string>DKDTextArea</string>
					<key>DKDLockInfo</key>
					<string>14</string>
					<key>GraphicID</key>
					<string>877C15CB</string>
					<key>GraphicStyle</key>
					<string>10</string>
				</dict>
				<dict>
					<key>AttributedText</key>
					<dict>
						<key>String</key>
						<string>IM</string>
						<key>TextAttribute</key>
						<string>48</string>
					</dict>
					<key>Bounds</key>
					<string>{{22.5934000847, 271.093867151}, {40.0422290087, 17}}</string>
					<key>Class</key>
					<string>DKDTextArea</string>
					<key>DKDLockInfo</key>
					<string>14</string>
					<key>GraphicID</key>
					<string>F64546CB</string>
					<key>GraphicStyle</key>
					<string>10</string>
				</dict>
				<dict>
					<key>AttributedText</key>
					<dict>
						<key>String</key>
						<string>cytosol</string>
						<key>TextAttribute</key>
						<string>48</string>
					</dict>
					<key>Bounds</key>
					<string>{{56.4956198822, 34.2974083502}, {63.029690614, 17.5233660726}}</string>
					<key>Class</key>
					<string>DKDTextArea</string>
					<key>DKDLockInfo</key>
					<string>14</string>
					<key>GraphicID</key>
					<string>E47047CB</string>
					<key>GraphicStyle</key>
					<string>10</string>
				</dict>
				<dict>
					<key>AttributedText</key>
					<dict>
						<key>String</key>
						<string>ER lumen</string>
						<key>TextAttribute</key>
						<string>48</string>
					</dict>
					<key>Bounds</key>
					<string>{{2.710936639331, 115.545440276}, {80.601217236, 17.5233660726}}</string>
					<key>Class</key>
					<string>DKDTextArea</string>
					<key>DKDLockInfo</key>
					<string>14</string>
					<key>GraphicID</key>
					<string>7ACFF7CB</string>
					<key>GraphicStyle</key>
					<string>10</string>
				</dict>
				<dict>
					<key>AttributedText</key>
					<dict>
						<key>String</key>
						<string>(PS)</string>
						<key>TextAttribute</key>
						<string>0</string>
					</dict>
					<key>Bounds</key>
					<string>{{19.3189607119, 223.428509011}, {112.177250576, 45.9530798241}}</string>
					<key>Class</key>
					<string>DKDTextArea</string>
					<key>DKDLockInfo</key>
					<string>14</string>
					<key>GraphicID</key>
					<string>8DECB8CB</string>
					<key>GraphicStyle</key>
					<string>10</string>
				</dict>
				<dict>
					<key>Bounds</key>
					<string>{{141.423455821, 237.308907078}, {26.2928610021, 29.7615632348}}</string>
					<key>Class</key>
					<string>DKDUpDrum</string>
					<key>DKDLockInfo</key>
					<string>14</string>
					<key>DrumBowFraction</key>
					<string>0.125</string>
					<key>GraphicID</key>
					<string>B7819BCB</string>
					<key>GraphicStyle</key>
					<string>40</string>
				</dict>
				<dict>
					<key>Bounds</key>
					<string>{{141.423455821, 267.938971984}, {26.3143373124, 28.915975513}}</string>
					<key>Class</key>
					<string>DKDUpDrum</string>
					<key>DKDLockInfo</key>
					<string>14</string>
					<key>DrumBowFraction</key>
					<string>0.125</string>
					<key>GraphicID</key>
					<string>74460CCB</string>
					<key>GraphicStyle</key>
					<string>56</string>
				</dict>
				<dict>
					<key>AttributedText</key>
					<dict>
						<key>String</key>
						<string>Toc75</string>
						<key>TextAttribute</key>
						<string>64</string>
					</dict>
					<key>Bounds</key>
					<string>{{137.671589392, 247.310570228}, {35.4408206452, 19.0928757371}}</string>
					<key>Class</key>
					<string>DKDTextArea</string>
					<key>DKDLockInfo</key>
					<string>14</string>
					<key>GraphicID</key>
					<string>AEDDEDCB</string>
					<key>GraphicStyle</key>
					<string>10</string>
				</dict>
				<dict>
					<key>AttributedText</key>
					<dict>
						<key>String</key>
						<string>Tic</string>
						<key>TextAttribute</key>
						<string>80</string>
					</dict>
					<key>Bounds</key>
					<string>{{143.661926932, 277.372318802}, {30.11915119, 15.214873798}}</string>
					<key>Class</key>
					<string>DKDTextArea</string>
					<key>DKDLockInfo</key>
					<string>14</string>
					<key>GraphicID</key>
					<string>486B90DB</string>
					<key>GraphicStyle</key>
					<string>10</string>
				</dict>
				<dict>
					<key>AttributedText</key>
					<dict>
						<key>String</key>
						<string>stroma</string>
						<key>TextAttribute</key>
						<string>96</string>
					</dict>
					<key>Bounds</key>
					<string>{{123.921986428, 304.632270325}, {56.1670332722, 17.5233660726}}</string>
					<key>Class</key>
					<string>DKDTextArea</string>
					<key>DKDLockInfo</key>
					<string>14</string>
					<key>GraphicID</key>
					<string>930272DB</string>
					<key>GraphicStyle</key>
					<string>10</string>
				</dict>
				<dict>
					<key>AttributedText</key>
					<dict>
						<key>String</key>
						<string>TP/L</string>
						<key>TextAttribute</key>
						<string>112</string>
					</dict>
					<key>Bounds</key>
					<string>{{71.7486594157, 102.231513751}, {42.6428149488, 18.1756208049}}</string>
					<key>Class</key>
					<string>DKDTextArea</string>
					<key>DKDLockInfo</key>
					<string>14</string>
					<key>GraphicID</key>
					<string>C57A58DB</string>
					<key>GraphicStyle</key>
					<string>10</string>
				</dict>
				<dict>
					<key>Class</key>
					<string>DKDBezier</string>
					<key>DKDLockInfo</key>
					<string>14</string>
					<key>GraphicID</key>
					<string>A300F9DB</string>
					<key>GraphicStyle</key>
					<string>72</string>
					<key>SVGPath</key>
					<string>M8.156087851727,152.100419844 C136.094061592,113.672969767 47.2143706952,145.814330788 96.2229678016,142.869908762</string>
				</dict>
				<dict>
					<key>AttributedText</key>
					<dict>
						<key>String</key>
						<string>TP/L receptor</string>
						<key>TextAttribute</key>
						<string>112</string>
					</dict>
					<key>Bounds</key>
					<string>{{112.597360161, 144.50830185}, {104.820638097, 18.7868655091}}</string>
					<key>Class</key>
					<string>DKDTextArea</string>
					<key>DKDLockInfo</key>
					<string>14</string>
					<key>GraphicID</key>
					<string>55890CDB</string>
					<key>GraphicStyle</key>
					<string>10</string>
				</dict>
				<dict>
					<key>Bounds</key>
					<string>{{126.815218778, 98.5454032883}, {3.761205432433, 11.1774433234}}</string>
					<key>Class</key>
					<string>DKDRoundedRectangle</string>
					<key>DKDLockInfo</key>
					<string>14</string>
					<key>DKDRectRadius0</key>
					<string>10</string>
					<key>DKDRectRadius1</key>
					<string>10</string>
					<key>DKDRectRadius2</key>
					<string>10</string>
					<key>DKDRectRadius3</key>
					<string>10</string>
					<key>GraphicID</key>
					<string>3A976FDB</string>
					<key>GraphicStyle</key>
					<string>105</string>
				</dict>
				<dict>
					<key>Bounds</key>
					<string>{{157.537145697, 69.4662179901}, {3.761205432433, 11.1774433234}}</string>
					<key>Class</key>
					<string>DKDRoundedRectangle</string>
					<key>DKDLockInfo</key>
					<string>14</string>
					<key>DKDRectRadius0</key>
					<string>10</string>
					<key>DKDRectRadius1</key>
					<string>10</string>
					<key>DKDRectRadius2</key>
					<string>10</string>
					<key>DKDRectRadius3</key>
					<string>10</string>
					<key>GraphicID</key>
					<string>B299C2EB</string>
					<key>GraphicStyle</key>
					<string>105</string>
				</dict>
				<dict>
					<key>AttributedText</key>
					<dict>
						<key>String</key>
						<string>SRP</string>
						<key>TextAttribute</key>
						<string>128</string>
					</dict>
					<key>Bounds</key>
					<string>{{168.563762929, 43.0169272826}, {63.029690614, 17.5233660726}}</string>
					<key>Class</key>
					<string>DKDTextArea</string>
					<key>DKDLockInfo</key>
					<string>14</string>
					<key>GraphicID</key>
					<string>2EADA4EB</string>
					<key>GraphicStyle</key>
					<string>10</string>
				</dict>
				<dict>
					<key>Bounds</key>
					<string>{{180.307703865, 59.2432283928}, {12.8604050956, 8.297695681471}}</string>
					<key>Class</key>
					<string>DKDRadiusRectangle</string>
					<key>DKDLockInfo</key>
					<string>14</string>
					<key>DKDRectRadius0</key>
					<string>4.148847840735</string>
					<key>DKDRectRadius1</key>
					<string>4.148847840735</string>
					<key>DKDRectRadius2</key>
					<string>4.148847840735</string>
					<key>DKDRectRadius3</key>
					<string>4.148847840735</string>
					<key>GraphicID</key>
					<string>8C6DF5EB</string>
					<key>GraphicStyle</key>
					<string>137</string>
				</dict>
				<dict>
					<key>AttributedText</key>
					<dict>
						<key>String</key>
						<string>SP</string>
						<key>TextAttribute</key>
						<string>144</string>
					</dict>
					<key>Bounds</key>
					<string>{{109.35646053, 109.128092874}, {63.029690614, 17.5233660726}}</string>
					<key>Class</key>
					<string>DKDTextArea</string>
					<key>DKDLockInfo</key>
					<string>14</string>
					<key>GraphicID</key>
					<string>AF95DEEB</string>
					<key>GraphicStyle</key>
					<string>10</string>
				</dict>
				<dict>
					<key>AttributedText</key>
					<dict>
						<key>String</key>
						<string>ribosomes</string>
						<key>TextAttribute</key>
						<string>160</string>
					</dict>
					<key>Bounds</key>
					<string>{{49.8705904824, 55.607005903}, {93.760338284, 17.5233660726}}</string>
					<key>Class</key>
					<string>DKDTextArea</string>
					<key>DKDLockInfo</key>
					<string>14</string>
					<key>GraphicID</key>
					<string>473903FB</string>
					<key>GraphicStyle</key>
					<string>10</string>
				</dict>
				<dict>
					<key>AttributedText</key>
					<dict>
						<key>String</key>
						<string>1</string>
						<key>TextAttribute</key>
						<string>160</string>
					</dict>
					<key>Bounds</key>
					<string>{{149.942771504, 36.8621741258}, {17.7927715215, 14.9787914732}}</string>
					<key>Class</key>
					<string>DKDTextArea</string>
					<key>DKDLockInfo</key>
					<string>14</string>
					<key>GraphicID</key>
					<string>FCB266FB</string>
					<key>GraphicStyle</key>
					<string>10</string>
				</dict>
				<dict>
					<key>AttributedText</key>
					<dict>
						<key>String</key>
						<string>2</string>
						<key>TextAttribute</key>
						<string>160</string>
					</dict>
					<key>Bounds</key>
					<string>{{118.141254859, 37.33542265}, {17.7927715215, 14.9787914732}}</string>
					<key>Class</key>
					<string>DKDTextArea</string>
					<key>DKDLockInfo</key>
					<string>14</string>
					<key>GraphicID</key>
					<string>8A0507FB</string>
					<key>GraphicStyle</key>
					<string>10</string>
				</dict>
				<dict>
					<key>AttributedText</key>
					<dict>
						<key>String</key>
						<string>3</string>
						<key>TextAttribute</key>
						<string>160</string>
					</dict>
					<key>Bounds</key>
					<string>{{30.3329946902, 38.2513132772}, {17.7927715215, 14.9787914732}}</string>
					<key>Class</key>
					<string>DKDTextArea</string>
					<key>DKDLockInfo</key>
					<string>14</string>
					<key>GraphicID</key>
					<string>9203A7FB</string>
					<key>GraphicStyle</key>
					<string>10</string>
				</dict>
				<dict>
					<key>AttributedText</key>
					<dict>
						<key>String</key>
						<string>SRP-</string>
						<key>TextAttribute</key>
						<string>176</string>
					</dict>
					<key>Bounds</key>
					<string>{{172.693327872, 79.4430366179}, {44.7355358323, 13}}</string>
					<key>Class</key>
					<string>DKDTextArea</string>
					<key>DKDLockInfo</key>
					<string>14</string>
					<key>GraphicID</key>
					<string>C86DC9FB</string>
					<key>GraphicStyle</key>
					<string>10</string>
				</dict>
				<dict>
					<key>Bounds</key>
					<string>{{153.521953379, 79.2847523814}, {21.6545713707, 11.5882622202}}</string>
					<key>Class</key>
					<string>DKDUpTearOff</string>
					<key>DKDLockInfo</key>
					<string>14</string>
					<key>GraphicID</key>
					<string>D567DAFB</string>
					<key>GraphicStyle</key>
					<string>137</string>
				</dict>
				<dict>
					<key>Bounds</key>
					<string>{{92.977819416, 117.10511161}, {10.6202704828, 9.485684590068}}</string>
					<key>Class</key>
					<string>DKDTriangleUp</string>
					<key>DKDLockInfo</key>
					<string>14</string>
					<key>GraphicID</key>
					<string>CBCEA10C</string>
					<key>GraphicStyle</key>
					<string>105</string>
					<key>TriangleTipFraction</key>
					<string>0.5</string>
				</dict>
				<dict>
					<key>AttributedText</key>
					<dict>
						<key>String</key>
						<string>signal peptidase</string>
						<key>TextAttribute</key>
						<string>144</string>
					</dict>
					<key>Bounds</key>
					<string>{{100.481402075, 119.708938992}, {106.505870073, 14.8406958748}}</string>
					<key>Class</key>
					<string>DKDTextArea</string>
					<key>DKDLockInfo</key>
					<string>14</string>
					<key>GraphicID</key>
					<string>2C9FD20C</string>
					<key>GraphicStyle</key>
					<string>10</string>
				</dict>
				<dict>
					<key>AttributedText</key>
					<dict>
						<key>String</key>
						<string>derlin</string>
						<key>TextAttribute</key>
						<string>192</string>
					</dict>
					<key>Bounds</key>
					<string>{{32.3872451518, 176.900036335}, {54.2204483246, 18.8528248267}}</string>
					<key>Class</key>
					<string>DKDTextArea</string>
					<key>DKDLockInfo</key>
					<string>14</string>
					<key>GraphicID</key>
					<string>28FED90C</string>
					<key>GraphicStyle</key>
					<string>10</string>
				</dict>
				<dict>
					<key>Bounds</key>
					<string>{{70.9490112242, 148.409165763}, {12.0091622502, 38.3775748485}}</string>
					<key>Class</key>
					<string>DKDRadiusRectangle</string>
					<key>DKDLockInfo</key>
					<string>14</string>
					<key>DKDRectRadius0</key>
					<string>6.004581125109</string>
					<key>DKDRectRadius1</key>
					<string>6.004581125109</string>
					<key>DKDRectRadius2</key>
					<string>6.004581125109</string>
					<key>DKDRectRadius3</key>
					<string>6.004581125109</string>
					<key>GraphicID</key>
					<string>2BA8CA0C</string>
					<key>GraphicStyle</key>
					<string>41</string>
				</dict>
				<dict>
					<key>Class</key>
					<string>DKDBezier</string>
					<key>DKDLockInfo</key>
					<string>14</string>
					<key>GraphicID</key>
					<string>78471D0C</string>
					<key>GraphicStyle</key>
					<string>72</string>
					<key>SVGPath</key>
					<string>M83.4308740208,163.665911323 C84.572687223,197.538489798 73.5137866936,206.306738625 145.40993251,238.890019972</string>
				</dict>
				<dict>
					<key>Bounds</key>
					<string>{{147.11901374, 238.980984087}, {17.2942869797, 4.391978721465}}</string>
					<key>Class</key>
					<string>DKDTriangleDown</string>
					<key>DKDLockInfo</key>
					<string>14</string>
					<key>GraphicID</key>
					<string>A11E2F0C</string>
					<key>GraphicStyle</key>
					<string>73</string>
					<key>TriangleTipFraction</key>
					<string>0.5</string>
				</dict>
				<dict>
					<key>Class</key>
					<string>DKDBezier</string>
					<key>DKDLockInfo</key>
					<string>14</string>
					<key>GraphicID</key>
					<string>38A4F01C</string>
					<key>GraphicStyle</key>
					<string>72</string>
					<key>SVGPath</key>
					<string>M139.556333816,217.925524298 C117.306731119,176.343556823 106.247830589,185.11180565 148.236138565,187.804635102</string>
				</dict>
				<dict>
					<key>Bounds</key>
					<string>{{153.773066467, 188.177047018}, {17.2942869797, 4.391978721465}}</string>
					<key>Class</key>
					<string>DKDTriangleDown</string>
					<key>DKDLockInfo</key>
					<string>14</string>
					<key>GraphicID</key>
					<string>A00CF21C</string>
					<key>GraphicStyle</key>
					<string>73</string>
					<key>TriangleTipFraction</key>
					<string>0.5</string>
				</dict>
				<dict>
					<key>Bounds</key>
					<string>{{144.902506606, 190.444151934}, {10.6202704828, 9.485684590068}}</string>
					<key>Class</key>
					<string>DKDTriangleUp</string>
					<key>DKDLockInfo</key>
					<string>14</string>
					<key>GraphicID</key>
					<string>6965931C</string>
					<key>GraphicStyle</key>
					<string>105</string>
					<key>TriangleTipFraction</key>
					<string>0.5</string>
				</dict>
				<dict>
					<key>AttributedText</key>
					<dict>
						<key>String</key>
						<string>TPL</string>
						<key>TextAttribute</key>
						<string>144</string>
					</dict>
					<key>Bounds</key>
					<string>{{150.980228792, 193.056402021}, {35.2649158135, 13.0994906626}}</string>
					<key>Class</key>
					<string>DKDTextArea</string>
					<key>DKDLockInfo</key>
					<string>14</string>
					<key>GraphicID</key>
					<string>C117E31C</string>
					<key>GraphicStyle</key>
					<string>10</string>
				</dict>
				<dict>
					<key>AttributedText</key>
					<dict>
						<key>String</key>
						<string>peptidase</string>
						<key>TextAttribute</key>
						<string>208</string>
					</dict>
					<key>Bounds</key>
					<string>{{136.384207612, 201.730250631}, {58.7060546875, 13}}</string>
					<key>Class</key>
					<string>DKDTextArea</string>
					<key>DKDLockInfo</key>
					<string>14</string>
					<key>GraphicID</key>
					<string>1EDA451C</string>
					<key>GraphicStyle</key>
					<string>10</string>
				</dict>
				<dict>
					<key>AttributedText</key>
					<dict>
						<key>String</key>
						<string>TPL</string>
						<key>TextAttribute</key>
						<string>112</string>
					</dict>
					<key>Bounds</key>
					<string>{{166.972404062, 181.924007908}, {32.8288229594, 15.088151548}}</string>
					<key>Class</key>
					<string>DKDTextArea</string>
					<key>DKDLockInfo</key>
					<string>14</string>
					<key>GraphicID</key>
					<string>C91BA51C</string>
					<key>GraphicStyle</key>
					<string>10</string>
				</dict>
				<dict>
					<key>Bounds</key>
					<string>{{59.9178857946, 298.956777293}, {10.6202704828, 9.485684590068}}</string>
					<key>Class</key>
					<string>DKDTriangleUp</string>
					<key>DKDLockInfo</key>
					<string>14</string>
					<key>GraphicID</key>
					<string>347A581C</string>
					<key>GraphicStyle</key>
					<string>105</string>
					<key>TriangleTipFraction</key>
					<string>0.5</string>
				</dict>
				<dict>
					<key>AttributedText</key>
					<dict>
						<key>String</key>
						<string>TP</string>
						<key>TextAttribute</key>
						<string>144</string>
					</dict>
					<key>Bounds</key>
					<string>{{35.7739923808, 309.064098227}, {35.2649158135, 13.0994906626}}</string>
					<key>Class</key>
					<string>DKDTextArea</string>
					<key>DKDLockInfo</key>
					<string>14</string>
					<key>GraphicID</key>
					<string>547A581C</string>
					<key>GraphicStyle</key>
					<string>10</string>
				</dict>
				<dict>
					<key>AttributedText</key>
					<dict>
						<key>String</key>
						<string>peptidase</string>
						<key>TextAttribute</key>
						<string>208</string>
					</dict>
					<key>Bounds</key>
					<string>{{53.0660416326, 308.388105712}, {58.7060546875, 13}}</string>
					<key>Class</key>
					<string>DKDTextArea</string>
					<key>DKDLockInfo</key>
					<string>14</string>
					<key>GraphicID</key>
					<string>647A581C</string>
					<key>GraphicStyle</key>
					<string>10</string>
				</dict>
				<dict>
					<key>Class</key>
					<string>DKDBezier</string>
					<key>DKDLockInfo</key>
					<string>14</string>
					<key>GraphicID</key>
					<string>A60CB81C</string>
					<key>GraphicStyle</key>
					<string>72</string>
					<key>SVGPath</key>
					<string>M154.649344559,295.039236018 C121.828516014,313.723245172 76.155111248,300.110433913 71.0038442447,298.586390954</string>
				</dict>
				<dict>
					<key>Bounds</key>
					<string>{{43.6672191842, 298.069881197}, {17.2942869797, 4.391978721465}}</string>
					<key>Class</key>
					<string>DKDTriangleDown</string>
					<key>DKDLockInfo</key>
					<string>14</string>
					<key>GraphicID</key>
					<string>93597B1C</string>
					<key>GraphicStyle</key>
					<string>73</string>
					<key>TriangleTipFraction</key>
					<string>0.5</string>
				</dict>
				<dict>
					<key>AttributedText</key>
					<dict>
						<key>String</key>
						<string>TP</string>
						<key>TextAttribute</key>
						<string>112</string>
					</dict>
					<key>Bounds</key>
					<string>{{21.5173821165, 293.412641165}, {104.820638097, 18.7868655091}}</string>
					<key>Class</key>
					<string>DKDTextArea</string>
					<key>DKDLockInfo</key>
					<string>14</string>
					<key>GraphicID</key>
					<string>C50E4C1C</string>
					<key>GraphicStyle</key>
					<string>10</string>
				</dict>
				<dict>
					<key>AttributedText</key>
					<dict>
						<key>String</key>
						<string>TP/L</string>
						<key>TextAttribute</key>
						<string>112</string>
					</dict>
					<key>Bounds</key>
					<string>{{95.8795265972, 83.2361900586}, {42.6428149488, 18.1756208049}}</string>
					<key>Class</key>
					<string>DKDTextArea</string>
					<key>DKDLockInfo</key>
					<string>14</string>
					<key>GraphicID</key>
					<string>07A3192C</string>
					<key>GraphicStyle</key>
					<string>10</string>
				</dict>
				<dict>
					<key>Bounds</key>
					<string>{{74.4532717872, 187.975879385}, {49.8357406639, 20.2882757536}}</string>
					<key>Class</key>
					<string>DKDGroup</string>
					<key>DKDLockInfo</key>
					<string>14</string>
					<key>GraphicID</key>
					<string>4FB84CFB</string>
					<key>GroupGraphics</key>
					<array>
						<dict>
							<key>Bounds</key>
							<string>{{77.5450708489, 187.975879385}, {36.2263584546, 15.8363803669}}</string>
							<key>Class</key>
							<string>DKDRoundedRectangle</string>
							<key>DKDLockInfo</key>
							<string>14</string>
							<key>DKDRectRadius0</key>
							<string>7.918190183474</string>
							<key>DKDRectRadius1</key>
							<string>7.918190183474</string>
							<key>DKDRectRadius2</key>
							<string>7.918190183474</string>
							<key>DKDRectRadius3</key>
							<string>7.918190183474</string>
							<key>GraphicID</key>
							<string>B1BDDD2C</string>
							<key>GraphicStyle</key>
							<string>41</string>
						</dict>
						<dict>
							<key>AttributedText</key>
							<dict>
								<key>String</key>
								<string>Cdc48</string>
								<key>TextAttribute</key>
								<string>224</string>
							</dict>
							<key>Bounds</key>
							<string>{{74.4532717872, 189.765661732}, {49.8357406639, 18.498493407}}</string>
							<key>Class</key>
							<string>DKDTextArea</string>
							<key>DKDLockInfo</key>
							<string>14</string>
							<key>GraphicID</key>
							<string>4073303C</string>
							<key>GraphicStyle</key>
							<string>10</string>
						</dict>
					</array>
				</dict>
				<dict>
					<key>Bounds</key>
					<string>{{126.787046662, 237.14862428}, {13.6747212065, 10.1366374167}}</string>
					<key>Class</key>
					<string>DKDCloud</string>
					<key>DKDLockInfo</key>
					<string>14</string>
					<key>GraphicID</key>
					<string>A1F5A53C</string>
					<key>GraphicStyle</key>
					<string>57</string>
				</dict>
				<dict>
					<key>AttributedText</key>
					<dict>
						<key>String</key>
						<string>TP receptor</string>
						<key>TextAttribute</key>
						<string>112</string>
					</dict>
					<key>Bounds</key>
					<string>{{71.3419730872, 230.616570343}, {104.820638097, 18.7868655091}}</string>
					<key>Class</key>
					<string>DKDTextArea</string>
					<key>DKDLockInfo</key>
					<string>14</string>
					<key>GraphicID</key>
					<string>B89C963C</string>
					<key>GraphicStyle</key>
					<string>10</string>
				</dict>
				<dict>
					<key>AttributedText</key>
					<dict>
						<key>String</key>
						<string>periplastid</string>
						<key>TextAttribute</key>
						<string>0</string>
					</dict>
					<key>Bounds</key>
					<string>{{2.029344298559, 195.172866227}, {75.9923976315, 18.4812846125}}</string>
					<key>Class</key>
					<string>DKDTextArea</string>
					<key>DKDLockInfo</key>
					<string>14</string>
					<key>GraphicID</key>
					<string>0628A73C</string>
					<key>GraphicStyle</key>
					<string>10</string>
				</dict>
				<dict>
					<key>AttributedText</key>
					<dict>
						<key>String</key>
						<string>space</string>
						<key>TextAttribute</key>
						<string>0</string>
					</dict>
					<key>Bounds</key>
					<string>{{14.7062257599, 208.472483428}, {51.3260977084, 18.8913848933}}</string>
					<key>Class</key>
					<string>DKDTextArea</string>
					<key>DKDLockInfo</key>
					<string>14</string>
					<key>GraphicID</key>
					<string>EBEA383C</string>
					<key>GraphicStyle</key>
					<string>10</string>
				</dict>
				<dict>
					<key>AttributedText</key>
					<dict>
						<key>String</key>
						<string>receptor</string>
						<key>TextAttribute</key>
						<string>176</string>
					</dict>
					<key>Bounds</key>
					<string>{{167.674391623, 88.1360364342}, {51.3530273438, 13}}</string>
					<key>Class</key>
					<string>DKDTextArea</string>
					<key>DKDLockInfo</key>
					<string>14</string>
					<key>GraphicID</key>
					<string>639B154C</string>
					<key>GraphicStyle</key>
					<string>10</string>
				</dict>
				<dict>
					<key>AttributedText</key>
					<dict>
						<key>String</key>
						<string>
</string>
						<key>TextAttribute</key>
						<string>176</string>
					</dict>
					<key>Bounds</key>
					<string>{{181.857724956, 102.319369768}, {51.3530273438, 13}}</string>
					<key>Class</key>
					<string>DKDTextArea</string>
					<key>DKDLockInfo</key>
					<string>14</string>
					<key>GraphicID</key>
					<string>2AE5BB4C</string>
					<key>GraphicStyle</key>
					<string>10</string>
				</dict>
				<dict>
					<key>Bounds</key>
					<string>{{26.7190688411, 329.308572619}, {136.948601633, 23.8404963236}}</string>
					<key>Class</key>
					<string>DKDRoundedRectangle</string>
					<key>DKDLockInfo</key>
					<string>14</string>
					<key>DKDRectRadius0</key>
					<string>10</string>
					<key>DKDRectRadius1</key>
					<string>10</string>
					<key>DKDRectRadius2</key>
					<string>10</string>
					<key>DKDRectRadius3</key>
					<string>10</string>
					<key>GraphicID</key>
					<string>D2095BBB</string>
					<key>GraphicStyle</key>
					<string>88</string>
				</dict>
				<dict>
					<key>AttributedText</key>
					<dict>
						<key>String</key>
						<string>Ub</string>
						<key>TextAttribute</key>
						<string>48</string>
					</dict>
					<key>Bounds</key>
					<string>{{102.772395383, 164.301461239}, {28.6212393464, 17}}</string>
					<key>Class</key>
					<string>DKDTextArea</string>
					<key>DKDLockInfo</key>
					<string>14</string>
					<key>GraphicID</key>
					<string>4DAFDA5C</string>
					<key>GraphicStyle</key>
					<string>10</string>
				</dict>
				<dict>
					<key>AttributedText</key>
					<dict>
						<key>String</key>
						<string>deUb</string>
						<key>TextAttribute</key>
						<string>48</string>
					</dict>
					<key>Bounds</key>
					<string>{{138.160312843, 214.143550777}, {59.6552919673, 18.333151389}}</string>
					<key>Class</key>
					<string>DKDTextArea</string>
					<key>DKDLockInfo</key>
					<string>14</string>
					<key>GraphicID</key>
					<string>B6387D5C</string>
					<key>GraphicStyle</key>
					<string>10</string>
				</dict>
				<dict>
					<key>AttributedText</key>
					<dict>
						<key>String</key>
						<string>TP</string>
						<key>TextAttribute</key>
						<string>112</string>
					</dict>
					<key>Bounds</key>
					<string>{{161.464071873, 231.246566797}, {27.6990122812, 14.7587694177}}</string>
					<key>Class</key>
					<string>DKDTextArea</string>
					<key>DKDLockInfo</key>
					<string>14</string>
					<key>GraphicID</key>
					<string>C4832F5C</string>
					<key>GraphicStyle</key>
					<string>10</string>
				</dict>
				<dict>
					<key>AttributedText</key>
					<dict>
						<key>String</key>
						<string>plastid</string>
						<key>TextAttribute</key>
						<string>48</string>
					</dict>
					<key>Bounds</key>
					<string>{{66.0226319196, 244.358256601}, {66.6130859431, 18.393039049}}</string>
					<key>Class</key>
					<string>DKDTextArea</string>
					<key>DKDLockInfo</key>
					<string>14</string>
					<key>GraphicID</key>
					<string>FAC8D90D</string>
					<key>GraphicStyle</key>
					<string>10</string>
				</dict>
				<dict>
					<key>ApproachBraceFraction</key>
					<string>0.9</string>
					<key>Bounds</key>
					<string>{{53.4533508286, 240.891603033}, {13.1994976284, 53.3989622764}}</string>
					<key>Class</key>
					<string>DKDRightBrace</string>
					<key>DKDLockInfo</key>
					<string>14</string>
					<key>GraphicID</key>
					<string>F91CDC0D</string>
					<key>GraphicStyle</key>
					<string>56</string>
					<key>MiterBraceDegrees</key>
					<string>30</string>
					<key>RadiusBraceFraction</key>
					<string>0.1</string>
					<key>TipBraceFraction</key>
					<string>0.5</string>
				</dict>
				<dict>
					<key>AttributedText</key>
					<dict>
						<key>String</key>
						<string>envelope</string>
						<key>TextAttribute</key>
						<string>48</string>
					</dict>
					<key>Bounds</key>
					<string>{{64.3240518013, 270.076021454}, {66.6130859431, 18.393039049}}</string>
					<key>Class</key>
					<string>DKDTextArea</string>
					<key>DKDLockInfo</key>
					<string>14</string>
					<key>GraphicID</key>
					<string>603D6D0D</string>
					<key>GraphicStyle</key>
					<string>10</string>
				</dict>
				<dict>
					<key>AttributedText</key>
					<dict>
						<key>String</key>
						<string>thylakoid</string>
						<key>TextAttribute</key>
						<string>96</string>
					</dict>
					<key>Bounds</key>
					<string>{{64.3378933437, 331.512076485}, {87.4380466909, 17.05988766}}</string>
					<key>Class</key>
					<string>DKDTextArea</string>
					<key>DKDLockInfo</key>
					<string>14</string>
					<key>GraphicID</key>
					<string>DC45BF0D</string>
					<key>GraphicStyle</key>
					<string>10</string>
				</dict>
				<dict>
					<key>Bounds</key>
					<string>{{96.8034463138, 161.950137613}, {9.059793656933, 24.8317707787}}</string>
					<key>Class</key>
					<string>DKDRadiusRectangle</string>
					<key>DKDLockInfo</key>
					<string>14</string>
					<key>DKDRectRadius0</key>
					<string>0.183361435933</string>
					<key>DKDRectRadius1</key>
					<string>1.00224317683</string>
					<key>DKDRectRadius2</key>
					<string>5.119577821923</string>
					<key>DKDRectRadius3</key>
					<string>0.183361435933</string>
					<key>GraphicID</key>
					<string>B149AE9A</string>
					<key>GraphicStyle</key>
					<string>169</string>
				</dict>
				<dict>
					<key>AttributedText</key>
					<dict>
						<key>String</key>
						<string>ATP</string>
						<key>TextAttribute</key>
						<string>240</string>
					</dict>
					<key>Bounds</key>
					<string>{{95.3743286367, 202.344262476}, {27.4483039425, 11}}</string>
					<key>Class</key>
					<string>DKDTextArea</string>
					<key>DKDLockInfo</key>
					<string>14</string>
					<key>GraphicID</key>
					<string>1277C2CA</string>
					<key>GraphicStyle</key>
					<string>10</string>
				</dict>
			</array>
			<key>HideDimensions</key>
			<string>NO</string>
			<key>LayerColorMod</key>
			<dict>
				<key>DKDOnColorMod</key>
				<string>NO</string>
				<key>DKDOpacityColorMod</key>
				<string>0.5</string>
				<key>DKDOutlineColorMod</key>
				<string>NO</string>
				<key>DKDTintColorColorMod</key>
				<dict>
					<key>ColorSpace</key>
					<string>NSCalibratedWhiteColorSpace</string>
					<key>Opacity</key>
					<string>1</string>
					<key>White</key>
					<string>0.5</string>
				</dict>
				<key>DKDTintFractionColorMod</key>
				<string>0.5</string>
			</dict>
			<key>LayerLock</key>
			<string>NO</string>
			<key>LayerName</key>
			<string>Paper</string>
			<key>LayerState</key>
			<string>Active</string>
			<key>OutlineLayer</key>
			<string>NO</string>
		</dict>
	</array>
	<key>DKDPagesSpec</key>
	<dict>
		<key>BackgroundDisplay</key>
		<string>Background</string>
		<key>CanvasBorder</key>
		<string>rgb 0.54902 0.53333 0.53333 1</string>
		<key>CanvasColor</key>
		<string>rgb 0.28628 0.28628 0.28628 1</string>
		<key>CanvasMargin</key>
		<string>0</string>
		<key>DetailsDrawerWidth</key>
		<string>200</string>
		<key>DisplayAttributesBar</key>
		<string>YES</string>
		<key>DisplayRulers</key>
		<string>NO</string>
		<key>FullScreen</key>
		<string>NO</string>
		<key>FullScreenCanvasMargin</key>
		<string>141.73228</string>
		<key>LayersDrawerWidth</key>
		<string>200</string>
		<key>NonFullScreenCanvasMargin</key>
		<string>0</string>
		<key>NumberAcrossFirst</key>
		<string>YES</string>
		<key>PagesAcross</key>
		<string>1</string>
		<key>PagesDown</key>
		<string>1</string>
		<key>PagesSpecBackgroundRGB</key>
		<string>white 1 1</string>
		<key>PagesSpecPrintBackground</key>
		<string>NO</string>
		<key>ShowPageBreaks</key>
		<string>NO</string>
		<key>SizeChecker</key>
		<string>40</string>
		<key>aCheckerColor</key>
		<string>rgb 0.94118 0.94118 0.94118 1</string>
		<key>bCheckerColor</key>
		<string>rgb 0.76471 0.78824 0.70196 1</string>
	</dict>
	<key>DKDPrintInfo</key>
	<dict>
		<key>BottomMargin</key>
		<string>18</string>
		<key>Copies</key>
		<string>1</string>
		<key>FallBackPaperSizeHeight</key>
		<string>841.890014648</string>
		<key>FallBackPaperSizeWidth</key>
		<string>595.289978027</string>
		<key>FirstPage</key>
		<string>1</string>
		<key>HorizontalPagination</key>
		<string>2</string>
		<key>HorizontallyCentered</key>
		<string>YES</string>
		<key>LastPage</key>
		<string>-1</string>
		<key>LeftMargin</key>
		<string>18</string>
		<key>MustCollate</key>
		<string>YES</string>
		<key>Orientation</key>
		<string>0</string>
		<key>PaperName</key>
		<string>A4</string>
		<key>PaperSizeHeight</key>
		<string>841.890014648</string>
		<key>PaperSizeWidth</key>
		<string>595.289978027</string>
		<key>PreviewPageNumber</key>
		<string>1</string>
		<key>PrintAllPages</key>
		<string>YES</string>
		<key>PrintJobDisposition</key>
		<string>NSPrintSpoolJob</string>
		<key>PrintSavePath</key>
		<string></string>
		<key>PrintScalingFactor</key>
		<string>1</string>
		<key>PrinterName</key>
		<string>HP Photosmart 2600 series</string>
		<key>ReversePageOrder</key>
		<string>NO</string>
		<key>RightMargin</key>
		<string>18</string>
		<key>TopMargin</key>
		<string>18</string>
		<key>VerticalPagination</key>
		<string>0</string>
		<key>VerticallyCentered</key>
		<string>YES</string>
		<key>XPrintMirror</key>
		<string>NO</string>
		<key>YPrintMirror</key>
		<string>NO</string>
	</dict>
	<key>DKDSaveTimeStamp</key>
	<string>2017-04-01 09:50:52 +0000</string>
	<key>DKDSkeletonLayersList</key>
	<array>
		<dict>
			<key>CloakLayerGuidelines</key>
			<string>NO</string>
			<key>CloakLayerVertices</key>
			<string>NO</string>
			<key>FullLayerScale</key>
			<dict>
				<key>ArchivePrecision</key>
				<string>12</string>
				<key>ScaleOriginX</key>
				<string>0</string>
				<key>ScaleOriginY</key>
				<string>0</string>
				<key>ScalePlusDown</key>
				<string>YES</string>
				<key>ScalePlusToRight</key>
				<string>YES</string>
				<key>ScaleScale</key>
				<string>1</string>
				<key>ScaleUnits</key>
				<string>Centimeters</string>
			</dict>
			<key>HideDimensions</key>
			<string>NO</string>
			<key>LayerColorMod</key>
			<dict>
				<key>DKDOnColorMod</key>
				<string>NO</string>
				<key>DKDOpacityColorMod</key>
				<string>0.5</string>
				<key>DKDOutlineColorMod</key>
				<string>NO</string>
				<key>DKDTintColorColorMod</key>
				<dict>
					<key>ColorSpace</key>
					<string>NSCalibratedWhiteColorSpace</string>
					<key>Opacity</key>
					<string>1</string>
					<key>White</key>
					<string>0.5</string>
				</dict>
				<key>DKDTintFractionColorMod</key>
				<string>0.5</string>
			</dict>
			<key>LayerLock</key>
			<string>NO</string>
			<key>LayerName</key>
			<string>Layer--1</string>
			<key>LayerState</key>
			<string>On</string>
			<key>OutlineLayer</key>
			<string>NO</string>
		</dict>
		<dict>
			<key>CloakLayerGuidelines</key>
			<string>NO</string>
			<key>CloakLayerVertices</key>
			<string>NO</string>
			<key>FullLayerScale</key>
			<dict>
				<key>ArchivePrecision</key>
				<string>12</string>
				<key>ScaleOriginX</key>
				<string>0</string>
				<key>ScaleOriginY</key>
				<string>0</string>
				<key>ScalePlusDown</key>
				<string>YES</string>
				<key>ScalePlusToRight</key>
				<string>YES</string>
				<key>ScaleScale</key>
				<string>1</string>
				<key>ScaleUnits</key>
				<string>Centimeters</string>
			</dict>
			<key>HideDimensions</key>
			<string>NO</string>
			<key>LayerColorMod</key>
			<dict>
				<key>DKDOnColorMod</key>
				<string>NO</string>
				<key>DKDOpacityColorMod</key>
				<string>0.5</string>
				<key>DKDOutlineColorMod</key>
				<string>NO</string>
				<key>DKDTintColorColorMod</key>
				<dict>
					<key>ColorSpace</key>
					<string>NSCalibratedWhiteColorSpace</string>
					<key>Opacity</key>
					<string>1</string>
					<key>White</key>
					<string>0.5</string>
				</dict>
				<key>DKDTintFractionColorMod</key>
				<string>0.5</string>
			</dict>
			<key>LayerLock</key>
			<string>NO</string>
			<key>LayerName</key>
			<string>Paper</string>
			<key>LayerState</key>
			<string>Active</string>
			<key>OutlineLayer</key>
			<string>NO</string>
		</dict>
	</array>
	<key>DKDTablet</key>
	<dict>
		<key>BrushDynamic</key>
		<string>NO</string>
		<key>BrushFit</key>
		<string>6</string>
		<key>PenMax</key>
		<string>25</string>
		<key>PenMin</key>
		<string>0.5</string>
		<key>PenPressureFactor</key>
		<string>0.5</string>
		<key>PencilDynamic</key>
		<string>NO</string>
		<key>PencilFit</key>
		<string>7</string>
	</dict>
	<key>DKDTimeFormat</key>
	<dict>
		<key>Field 0 Include</key>
		<string>Weekday</string>
		<key>Field 0 Type</key>
		<string>Long</string>
		<key>Field 1 Include</key>
		<string>Month</string>
		<key>Field 1 Type</key>
		<string>Short</string>
		<key>Field 2 Include</key>
		<string>Day</string>
		<key>Field 2 Type</key>
		<string>Number</string>
		<key>Field 3 Include</key>
		<string>Year</string>
		<key>Field 3 Type</key>
		<string>Long</string>
		<key>Include GMT</key>
		<string>NO</string>
		<key>Include Title</key>
		<string>YES</string>
		<key>IncludeDate</key>
		<string>YES</string>
		<key>IncludeTime</key>
		<string>YES</string>
		<key>Seperator 0</key>
		<string> - </string>
		<key>Seperator 1</key>
		<string>. </string>
		<key>Seperator 2</key>
		<string>, </string>
		<key>Seperator 3</key>
		<string>  </string>
		<key>Time Seperator</key>
		<string>:</string>
		<key>TimeAfterDate</key>
		<string>YES</string>
		<key>Twelve Hour Clock</key>
		<string>YES</string>
		<key>Used Once</key>
		<string>YES</string>
	</dict>
	<key>DKDToolbarSelectedButtonPairs</key>
	<array>
		<string>ColorTextToolbarItemIdentifier_0</string>
		<array>
			<string>HSB_000000</string>
		</array>
		<string>ColorStrokeToolbarItemIdentifier_0</string>
		<array>
			<string>HSB_60FF80</string>
		</array>
		<string>ColorFillToolbarItemIdentifier_0</string>
		<array>
			<string>HSB_000000</string>
		</array>
		<string>GradientToolbarItemIdentifier_0</string>
		<array>
			<dict>
				<key>BurstPath</key>
				<array/>
				<key>BurstRect</key>
				<string>{{0.25, 0.25}, {0.5, 0.5}}</string>
				<key>EndGradientRGB</key>
				<dict>
					<key>Blue</key>
					<string>1.000000</string>
					<key>ColorSpace</key>
					<string>NSCalibratedRGBColorSpace</string>
					<key>Green</key>
					<string>1.000000</string>
					<key>Opacity</key>
					<string>1.000000</string>
					<key>Red</key>
					<string>1.000000</string>
				</dict>
				<key>GradientAngle</key>
				<string>0.000000</string>
				<key>GradientCompositeOperation</key>
				<string>Source Over</string>
				<key>GradientFillClass</key>
				<string>DKDHorizontalGradientFill</string>
				<key>GradientGradientConvergence</key>
				<dict>
					<key>FinishGradient</key>
					<string>100.00000</string>
					<key>GradientConvergence</key>
					<string>Linear</string>
					<key>StartGradient</key>
					<string>0.00000</string>
				</dict>
				<key>GradientImagePercent</key>
				<string>1.000000</string>
				<key>GradientOverlap</key>
				<string>1.000000</string>
				<key>GradientRadius</key>
				<string>0.000000</string>
				<key>LevelsOfGradient</key>
				<string>100</string>
				<key>StartGradientRGB</key>
				<dict>
					<key>Blue</key>
					<string>0.000000</string>
					<key>ColorSpace</key>
					<string>NSCalibratedRGBColorSpace</string>
					<key>Green</key>
					<string>0.000000</string>
					<key>Opacity</key>
					<string>1.000000</string>
					<key>Red</key>
					<string>0.000000</string>
				</dict>
				<key>SymmetryAngle</key>
				<string>0.000000</string>
			</dict>
		</array>
		<string>PatternForToolbarItemIdentifier_0</string>
		<array>
			<string>Toolbar_02</string>
		</array>
		<string>ChartingMenuToolbarIdentifier_0</string>
		<array>
			<string>Right Fat Arrow</string>
			<string>Right Fat Arrow</string>
			<string>Right Box Arrow</string>
			<string>Right Tear Off</string>
			<string>Right Brace</string>
			<string>Right Drum</string>
			<string>Folder</string>
			<string>Bilateral Octagon</string>
			<string>Rounded Rectangle</string>
			<string>Right Point</string>
			<string>Right Trapezoid</string>
			<string>Up Parallelogram</string>
			<string>Parallelogram</string>
			<string>Right Flame Arrow</string>
			<string>Right Nose Rectangle</string>
			<string>Right Rivet</string>
		</array>
		<string>StellateMenuToolbarIdentifier_0</string>
		<array>
			<string>Equilateral Polygon</string>
			<string>Equilateral Polygon</string>
			<string>Free Equilateral Polygon</string>
			<string>Cross Star</string>
			<string>Star</string>
			<string>Smooth Free Star</string>
			<string>Stagger Star</string>
			<string>Smooth Stagger Star</string>
			<string>Spoke</string>
		</array>
		<string>MathMenuToolbarIdentifier_0</string>
		<array>
			<string>Cubic (y = x**3), Adjustable</string>
			<string>Parabola (y = x**2), a centered fixed parabola</string>
			<string>Cubic (y = x**3), Adjustable</string>
			<string>Quartic (y = x**4), a centered fixed fourth order curve</string>
			<string>One over X (y = 1 / x) for x &gt; 0.0</string>
			<string>Natural Exponential (y = e**x), x &gt; 0</string>
			<string>Tangent (y = tan(x))</string>
			<string>Hyperbolic Tangent (y = tanh(x))</string>
			<string>Gaussian - The "Bell Shaped" probability curve</string>
			<string>Square Wave</string>
			<string>Sine (or Cosine) wave form, y = sin(x)</string>
		</array>
		<string>TechnicalMenuToolbarIdentifier_0</string>
		<array>
			<string>Orthogonal Path</string>
			<string>Orthogonal Path</string>
			<string>Auto Line</string>
			<string>Left Dimension</string>
			<string>Left External Dimension</string>
			<string>Report Information</string>
			<string>Rounded Text Bubble</string>
			<string>Straight Wall</string>
			<string>Free Wall</string>
			<string>Cog</string>
			<string>Tick Pattern</string>
		</array>
	</array>
	<key>DKDWindowState</key>
	<dict>
		<key>CursorMode</key>
		<string>Nothing</string>
		<key>DocCenter</key>
		<string>{279.644989013, 402.945007324}</string>
		<key>DocumentFileName</key>
		<string>/Users/rosecavalier-smith/Desktop/ChromistFig4.ezdraw</string>
		<key>DrawersOnMainView</key>
		<string>YES</string>
		<key>GDetailsLayersDrawerEdgePreference</key>
		<string>Auto</string>
		<key>GraphicDetailsOpen</key>
		<string>NO</string>
		<key>LayerActiveAbove</key>
		<string>NO</string>
		<key>LayerOpen</key>
		<string>NO</string>
		<key>LayerSelect</key>
		<string>Active Only</string>
		<key>LayersDrawerEdgePreference</key>
		<string>Auto</string>
		<key>OutlineDrawing</key>
		<string>NO</string>
		<key>WindowLocation</key>
		<string>2421 -23 1180 990 1920 -120 1920 1177 </string>
		<key>ZoomPercent</key>
		<string>100.000000</string>
	</dict>
	<key>GroupEdit</key>
	<string>Fixed</string>
	<key>IndependentLayers</key>
	<string>NO</string>
	<key>NumberColorsToListInContextMenu</key>
	<string>12</string>
	<key>NumberPairColorsToListInContextMenu</key>
	<string>6</string>
</dict>
</plist>
